# Supplementary material for: Atmospheric mercury concentration variations at Syowa Station, Lützow-Holm Bay, East Antarctica and contributing factors
Source: Royal Society of Chemistry journal article supplement (doi:10.1039/d4va00166d), 2024-11-12
Supplement: d4va00166d1.xlsx [file d4va00166d1.xlsx]

## Sheet: Original Hg conc in snow
No.	longitude	latotude	the days after snowing	日時 時刻帯C	Sampling point		T-Hg	D-Hg	P-Hg
East Ongul Island
Syowa Station	-69.004	39.5796	0	2021-12-28 10:30:00	7	Snow	0.90633	0.2965	0.60983
Syowa Station	-69.0068	39.5728	0	2021-12-28 14:35:00	9	Snow	0.456	0.253	0.203
Syowa Station	-69.004	39.5796	0	2022-01-04 16:40:00	7	Snow	0.45067	0.1675	0.28317
Syowa Station	-69.004	39.5796	1	2022-01-08 08:30:00	7	Snow	0.373	0.05067	0.32233
East Ongul Island
Syowa Station	-69.0077	39.583	13	2021-12-26 14:45:00	10	Snow	2.06767	0.4815	1.58617
Syowa Station	-69.0074	39.5825	13	2021-12-26 14:55:00	11	Snow	2.75267	0.157	2.59567
Syowa Station	-69.0047	39.5842	20	2022-02-07 11:10:00	8	Snow	2.11967	0.609	1.51067
West Ongul Island
East Ongul lake	-69.0227	39.5572	13	2021-12-25 13:20:00		Snow	0.447	0.315	0.132
Ice-free area
Skallen	-69.6759	39.4119	-	2022-01-13 09:20:00	5	Snow	5.602	0.291	5.311
Tama misaki	-68.725	40.4726	-	2022-02-08 10:00:00	1	Ice	3.685	0.76333	2.92167
Glacier/Ice sheet
Tottsuki misaki	-68.9112	39.8195	-	2021-12-25 10:00:00	2	Ice	0.6445	0.538	0.1065
Langhovde glacier	-69.2028	39.823	-	2021-12-22 12:30:00	4	Ice	2.17167	0.45667	1.715
Langhovde glacier	-69.2028	39.823	-	2022-01-24 15:55:00	4	Ice	1.514	0.647	0.867
Langhovde glacier	-69.2028	39.823	-	2022-01-31 16:00:00	4	Ice	2.2005	0.41467	1.78583
S16	-69.0289	40.0606	-	2022-01-21 13:30:00	3	Ice	0.76367	0.47467	0.289
S16	-69.0289	40.0606	-	2022-02-08 10:30:00	3	Ice	0.78867	0.41733	0.37134

## Sheet: Original Hg conc atmosphere
	yyyy/mm/dd hh:mm	Concentration (ng/m3)
	2021-12-29 00:56:00	1.37208
	2021-12-29 01:16:00	1.24948
	2021-12-29 01:36:00	1.28068
	2021-12-29 01:56:00	1.24923
	2021-12-29 02:16:00	1.26963
	2021-12-29 02:36:00	1.24997
	2021-12-29 02:56:00	1.26336
	2021-12-29 03:16:00	1.27196
	2021-12-29 03:36:00	1.33068
	2021-12-29 03:56:00	1.32098
	2021-12-29 04:16:00	1.37945
	2021-12-29 04:36:00	1.4012
	2021-12-29 04:56:00	1.45206
	2021-12-29 05:16:00	1.4781
	2021-12-29 05:36:00	1.57257
	2021-12-29 05:56:00	1.60451
	2021-12-29 06:16:00	1.65021
	2021-12-29 06:36:00	1.60021
	2021-12-29 06:56:00	1.62724
	2021-12-29 07:16:00	1.63486
	2021-12-29 07:36:00	1.62417
	2021-12-29 07:56:00	1.59567
	2021-12-29 08:16:00	1.57638
	2021-12-29 08:36:00	1.54604
	2021-12-29 08:56:00	1.56459
	2021-12-29 09:16:00	1.60144
	2021-12-29 09:36:00	1.57429
	2021-12-29 09:56:00	1.64444
	2021-12-29 10:16:00	1.60181
	2021-12-29 10:36:00	1.58756
	2021-12-29 10:56:00	1.59788
	2021-12-29 11:16:00	1.56729
	2021-12-29 11:36:00	1.57687
	2021-12-29 11:56:00	1.51127
	2021-12-29 12:16:00	1.50599
	2021-12-29 12:36:00
	2021-12-29 12:56:00
	2021-12-29 13:16:00
	2021-12-29 13:36:00
	2021-12-29 13:56:00
	2021-12-29 14:16:00
	2021-12-29 14:36:00
	2021-12-29 14:56:00
	2021-12-29 15:16:00
	2021-12-29 15:36:00
	2021-12-29 15:56:00
	2021-12-29 16:16:00	1.33256
	2021-12-29 16:36:00	1.4265
	2021-12-29 16:56:00	1.42994
	2021-12-29 17:16:00	1.43682
	2021-12-29 17:36:00	1.40967
	2021-12-29 17:56:00	1.38744
	2021-12-29 18:16:00	1.36336
	2021-12-29 18:36:00	1.36508
	2021-12-29 18:56:00	1.36877
	2021-12-29 19:16:00	1.32724
	2021-12-29 19:36:00	1.28093
	2021-12-29 19:56:00	1.24574
	2021-12-29 20:16:00	1.2215
	2021-12-29 20:36:00	1.23756
	2021-12-29 20:56:00	1.21654
	2021-12-29 21:16:00	1.2442
	2021-12-29 21:36:00	1.31594
	2021-12-29 21:56:00	1.20899
	2021-12-29 22:16:00	1.21519
	2021-12-29 22:36:00	1.16838
	2021-12-29 22:56:00	1.22994
	2021-12-29 23:16:00	1.31078
	2021-12-29 23:36:00	1.34248
	2021-12-29 23:56:00	1.24592
	2021-12-30 00:02:00
	2021-12-30 00:07:18
	2021-12-30 00:12:37
	2021-12-30 00:17:56
	2021-12-30 00:46:00	1.38928
	2021-12-30 01:06:00	1.38191
	2021-12-30 01:26:00	1.33707
	2021-12-30 01:46:00	1.24997
	2021-12-30 02:06:00	1.16962
	2021-12-30 02:26:00	1.17855
	2021-12-30 02:46:00	1.14636
	2021-12-30 03:06:00	1.16016
	2021-12-30 03:26:00	1.14695
	2021-12-30 03:46:00	1.15557
	2021-12-30 04:06:00	1.14067
	2021-12-30 04:26:00	1.13584
	2021-12-30 04:46:00	1.15321
	2021-12-30 05:06:00	1.13531
	2021-12-30 05:26:00	1.15941
	2021-12-30 05:46:00	1.13984
	2021-12-30 06:06:00	1.14599
	2021-12-30 06:26:00	1.15738
	2021-12-30 06:46:00	1.20535
	2021-12-30 07:06:00	1.22459
	2021-12-30 07:26:00	1.23609
	2021-12-30 07:46:00	1.19416
	2021-12-30 08:06:00	1.22591
	2021-12-30 08:26:00	1.1989
	2021-12-30 08:46:00	1.2099
	2021-12-30 09:06:00	1.22709
	2021-12-30 09:26:00	1.20694
	2021-12-30 09:46:00	1.24567
	2021-12-30 10:06:00	1.22015
	2021-12-30 10:26:00	1.22698
	2021-12-30 10:46:00	1.28412
	2021-12-30 11:06:00	1.25181
	2021-12-30 11:26:00	1.24972
	2021-12-30 11:46:00	1.29248
	2021-12-30 12:06:00	1.30427
	2021-12-30 12:26:00	1.31791
	2021-12-30 12:46:00	1.32908
	2021-12-30 13:06:00	1.27233
	2021-12-30 13:26:00	1.18316
	2021-12-30 13:46:00	1.22606
	2021-12-30 14:06:00	1.20862
	2021-12-30 14:26:00	1.24211
	2021-12-30 14:46:00	1.29542
	2021-12-30 15:06:00	1.22024
	2021-12-30 15:26:00	1.2118
	2021-12-30 15:46:00	1.24112
	2021-12-30 16:06:00	1.18879
	2021-12-30 16:26:00	1.18012
	2021-12-30 16:46:00	1.19015
	2021-12-30 17:06:00	1.20645
	2021-12-30 17:26:00	1.14691
	2021-12-30 17:46:00	1.12438
	2021-12-30 18:06:00	1.15743
	2021-12-30 18:26:00	1.13828
	2021-12-30 18:46:00	1.13541
	2021-12-30 19:06:00	1.13202
	2021-12-30 19:26:00	1.07692
	2021-12-30 19:46:00	1.10017
	2021-12-30 20:06:00	1.10505
	2021-12-30 20:26:00	1.07435
	2021-12-30 20:46:00	1.05516
	2021-12-30 21:06:00	1.09153
	2021-12-30 21:26:00	1.0764
	2021-12-30 21:46:00	1.09304
	2021-12-30 22:06:00	1.11064
	2021-12-30 22:26:00	1.07134
	2021-12-30 22:46:00	1.08805
	2021-12-30 23:06:00	1.07506
	2021-12-30 23:26:00	1.09029
	2021-12-30 23:46:00	1.10939
	2021-12-31 00:06:00	1.07834
	2021-12-31 00:11:18
	2021-12-31 00:16:36
	2021-12-31 00:21:54
	2021-12-31 00:27:12
	2021-12-31 00:56:00	1.16801
	2021-12-31 01:16:00	1.10076
	2021-12-31 01:36:00	1.13329
	2021-12-31 01:56:00	1.10561
	2021-12-31 02:16:00	1.1353
	2021-12-31 02:36:00	1.11565
	2021-12-31 02:56:00	1.11845
	2021-12-31 03:16:00	1.09313
	2021-12-31 03:36:00	1.0885
	2021-12-31 03:56:00	1.09185
	2021-12-31 04:16:00	1.11354
	2021-12-31 04:36:00	1.08911
	2021-12-31 04:56:00	1.10335
	2021-12-31 05:16:00	1.11044
	2021-12-31 05:36:00	1.11358
	2021-12-31 05:56:00	1.12003
	2021-12-31 06:16:00	1.11332
	2021-12-31 06:36:00	1.11378
	2021-12-31 06:56:00	1.15187
	2021-12-31 07:16:00	1.15609
	2021-12-31 07:36:00	1.1624
	2021-12-31 07:56:00	1.1879
	2021-12-31 08:16:00	1.18227
	2021-12-31 08:36:00	1.20536
	2021-12-31 08:56:00	1.18989
	2021-12-31 09:16:00	1.1986
	2021-12-31 09:36:00	1.20829
	2021-12-31 09:56:00	1.17845
	2021-12-31 10:16:00	1.2
	2021-12-31 10:36:00	1.19838
	2021-12-31 10:56:00	1.25525
	2021-12-31 11:16:00	1.20662
	2021-12-31 11:36:00	1.21307
	2021-12-31 11:56:00	1.18337
	2021-12-31 12:16:00	1.19799
	2021-12-31 12:36:00	1.23572
	2021-12-31 12:56:00	1.19747
	2021-12-31 13:16:00	1.19938
	2021-12-31 13:36:00	1.23351
	2021-12-31 13:56:00	1.19134
	2021-12-31 14:16:00	1.18671
	2021-12-31 14:36:00	1.16809
	2021-12-31 14:56:00	1.18953
	2021-12-31 15:16:00	1.2711
	2021-12-31 15:36:00	1.25218
	2021-12-31 15:56:00	1.19339
	2021-12-31 16:16:00	1.2042
	2021-12-31 16:36:00	1.16093
	2021-12-31 16:56:00	1.21483
	2021-12-31 17:16:00	1.17593
	2021-12-31 17:36:00	1.16211
	2021-12-31 17:56:00	1.17491
	2021-12-31 18:16:00	1.14981
	2021-12-31 18:36:00	1.15558
	2021-12-31 18:56:00	1.15907
	2021-12-31 19:16:00	1.37786
	2021-12-31 19:36:00	1.34063
	2021-12-31 19:56:00	1.13951
	2021-12-31 20:16:00	1.38459
	2021-12-31 20:36:00	1.41447
	2021-12-31 20:56:00	1.35525
	2021-12-31 21:16:00	1.33572
	2021-12-31 21:36:00	1.21809
	2021-12-31 21:56:00	1.18557
	2021-12-31 22:16:00	1.20918
	2021-12-31 22:36:00	1.15034
	2021-12-31 22:56:00	1.04675
	2021-12-31 23:16:00	1.02923
	2021-12-31 23:36:00	0.994792
	2021-12-31 23:56:00	0.994851
	2022-01-01 00:02:00
	2022-01-01 00:07:19
	2022-01-01 00:12:38
	2022-01-01 00:17:57
	2022-01-01 00:46:00	1.02134
	2022-01-01 01:06:00	1.00014
	2022-01-01 01:26:00	1.00498
	2022-01-01 01:46:00	0.978926
	2022-01-01 02:06:00	0.964841
	2022-01-01 02:26:00	1.02958
	2022-01-01 02:46:00	0.982859
	2022-01-01 03:06:00	0.9643
	2022-01-01 03:26:00	1.00413
	2022-01-01 03:46:00	1.03187
	2022-01-01 04:06:00	0.973141
	2022-01-01 04:26:00	1.00274
	2022-01-01 04:46:00	0.978649
	2022-01-01 05:06:00	1.03952
	2022-01-01 05:26:00	0.989394
	2022-01-01 05:46:00	1.1248
	2022-01-01 06:06:00	1.04855
	2022-01-01 06:26:00	1.02649
	2022-01-01 06:46:00	1.0194
	2022-01-01 07:06:00	1.03336
	2022-01-01 07:26:00	1.03073
	2022-01-01 07:46:00	1.11171
	2022-01-01 08:06:00	1.13059
	2022-01-01 08:26:00	1.07759
	2022-01-01 08:46:00	1.09952
	2022-01-01 09:06:00	1.10132
	2022-01-01 09:26:00	1.11054
	2022-01-01 09:46:00	1.13519
	2022-01-01 10:06:00	1.10747
	2022-01-01 10:26:00	1.10979
	2022-01-01 10:46:00	1.12315
	2022-01-01 11:06:00	1.11906
	2022-01-01 11:26:00	1.13307
	2022-01-01 11:46:00	1.16421
	2022-01-01 12:06:00	1.14197
	2022-01-01 12:26:00	1.15322
	2022-01-01 12:46:00	1.12229
	2022-01-01 13:06:00	1.11799
	2022-01-01 13:26:00	1.09868
	2022-01-01 13:46:00	1.09336
	2022-01-01 14:06:00	1.12401
	2022-01-01 14:26:00	1.11882
	2022-01-01 14:46:00	1.14603
	2022-01-01 15:06:00	1.13502
	2022-01-01 15:26:00	1.1476
	2022-01-01 15:46:00	1.1356
	2022-01-01 16:06:00	1.15017
	2022-01-01 16:26:00	1.11578
	2022-01-01 16:46:00	1.13124
	2022-01-01 17:06:00	1.11786
	2022-01-01 17:26:00	1.04867
	2022-01-01 17:46:00	1.06426
	2022-01-01 18:06:00	1.12852
	2022-01-01 18:26:00	1.1526
	2022-01-01 18:46:00	1.17205
	2022-01-01 19:06:00	1.1563
	2022-01-01 19:26:00	1.1322
	2022-01-01 19:46:00	1.15762
	2022-01-01 20:06:00	1.10782
	2022-01-01 20:26:00	1.10531
	2022-01-01 20:46:00	1.12543
	2022-01-01 21:06:00	1.10651
	2022-01-01 21:26:00	1.10759
	2022-01-01 21:46:00	1.12658
	2022-01-01 22:06:00	1.08292
	2022-01-01 22:26:00	1.09472
	2022-01-01 22:46:00	1.10754
	2022-01-01 23:06:00	1.0956
	2022-01-01 23:26:00	1.03485
	2022-01-01 23:46:00	0.983047
	2022-01-02 00:06:00	0.978723
	2022-01-02 00:11:17
	2022-01-02 00:16:34
	2022-01-02 00:21:51
	2022-01-02 00:27:09
	2022-01-02 00:56:00	0.988512
	2022-01-02 01:16:00	0.973308
	2022-01-02 01:36:00	0.97145
	2022-01-02 01:56:00	0.978412
	2022-01-02 02:16:00	0.935712
	2022-01-02 02:36:00	0.934304
	2022-01-02 02:56:00	0.955603
	2022-01-02 03:16:00	0.925412
	2022-01-02 03:36:00	0.894082
	2022-01-02 03:56:00	0.903052
	2022-01-02 04:16:00	0.861565
	2022-01-02 04:36:00	0.900745
	2022-01-02 04:56:00	0.935491
	2022-01-02 05:16:00	0.942736
	2022-01-02 05:36:00	0.941034
	2022-01-02 05:56:00	0.966228
	2022-01-02 06:16:00	1.00846
	2022-01-02 06:36:00	1.04946
	2022-01-02 06:56:00	1.12806
	2022-01-02 07:16:00	1.20071
	2022-01-02 07:36:00	1.11109
	2022-01-02 07:56:00	1.1509
	2022-01-02 08:16:00	1.14343
	2022-01-02 08:36:00	1.17078
	2022-01-02 08:56:00	1.22468
	2022-01-02 09:16:00	1.12152
	2022-01-02 09:36:00	1.09325
	2022-01-02 09:56:00	1.07786
	2022-01-02 10:16:00	1.04489
	2022-01-02 10:36:00	1.04262
	2022-01-02 10:56:00	1.05495
	2022-01-02 11:16:00	1.03336
	2022-01-02 11:36:00	1.06027
	2022-01-02 11:56:00	1.08596
	2022-01-02 12:16:00	1.10417
	2022-01-02 12:36:00	1.14842
	2022-01-02 12:56:00	1.10618
	2022-01-02 13:16:00	1.11679
	2022-01-02 13:36:00	1.09169
	2022-01-02 13:56:00	1.09048
	2022-01-02 14:16:00	1.08332
	2022-01-02 14:36:00	1.042
	2022-01-02 14:56:00	1.01267
	2022-01-02 15:16:00	1.06085
	2022-01-02 15:36:00	1.09673
	2022-01-02 15:56:00	1.12688
	2022-01-02 16:16:00	1.09571
	2022-01-02 16:36:00	1.11331
	2022-01-02 16:56:00	1.11637
	2022-01-02 17:16:00	1.12233
	2022-01-02 17:36:00	1.14274
	2022-01-02 17:56:00	1.16379
	2022-01-02 18:16:00	1.25795
	2022-01-02 18:36:00	1.22536
	2022-01-02 18:56:00	1.20448
	2022-01-02 19:16:00	1.20505
	2022-01-02 19:36:00	1.23928
	2022-01-02 19:56:00	1.24727
	2022-01-02 20:16:00	1.29616
	2022-01-02 20:36:00	1.27552
	2022-01-02 20:56:00	1.4684
	2022-01-02 21:16:00	1.7184
	2022-01-02 21:36:00	1.99234
	2022-01-02 21:56:00	1.76606
	2022-01-02 22:16:00	1.58867
	2022-01-02 22:36:00	1.61692
	2022-01-02 22:56:00	1.55279
	2022-01-02 23:16:00	1.65537
	2022-01-02 23:36:00	1.69235
	2022-01-02 23:56:00	1.7297
	2022-01-03 00:02:00
	2022-01-03 00:07:18
	2022-01-03 00:12:36
	2022-01-03 00:17:54
	2022-01-03 00:46:00	1.62896
	2022-01-03 01:06:00	1.52417
	2022-01-03 01:26:00	1.50808
	2022-01-03 01:46:00	1.42773
	2022-01-03 02:06:00	1.43523
	2022-01-03 02:26:00	1.42687
	2022-01-03 02:46:00	1.4899
	2022-01-03 03:06:00	1.30587
	2022-01-03 03:26:00	1.25267
	2022-01-03 03:46:00	1.14419
	2022-01-03 04:06:00	1.12686
	2022-01-03 04:26:00	1.2185
	2022-01-03 04:46:00	1.31189
	2022-01-03 05:06:00	1.33191
	2022-01-03 05:26:00	1.2437
	2022-01-03 05:46:00	1.19566
	2022-01-03 06:06:00	1.18441
	2022-01-03 06:26:00	1.11458
	2022-01-03 06:46:00	1.09182
	2022-01-03 07:06:00	1.12528
	2022-01-03 07:26:00	1.14344
	2022-01-03 07:46:00	1.28029
	2022-01-03 08:06:00	1.45525
	2022-01-03 08:26:00	1.43609
	2022-01-03 08:46:00	1.42061
	2022-01-03 09:06:00	1.36397
	2022-01-03 09:26:00	1.4598
	2022-01-03 09:46:00	1.43166
	2022-01-03 10:06:00	1.51066
	2022-01-03 10:26:00	1.5523
	2022-01-03 10:46:00	1.61975
	2022-01-03 11:06:00	1.6796
	2022-01-03 11:26:00	1.70144
	2022-01-03 11:46:00	1.68486
	2022-01-03 12:06:00	1.62503
	2022-01-03 12:26:00	1.61668
	2022-01-03 12:46:00	1.62552
	2022-01-03 13:06:00	1.58019
	2022-01-03 13:26:00	1.56336
	2022-01-03 13:46:00	1.56999
	2022-01-03 14:06:00	1.53289
	2022-01-03 14:26:00	1.52049
	2022-01-03 14:46:00	1.5109
	2022-01-03 15:06:00	1.43842
	2022-01-03 15:26:00	1.48068
	2022-01-03 15:46:00	1.47564
	2022-01-03 16:06:00	1.49862
	2022-01-03 16:26:00	1.54592
	2022-01-03 16:46:00	1.48879
	2022-01-03 17:06:00	1.47872
	2022-01-03 17:26:00	1.5609
	2022-01-03 17:46:00	1.5258
	2022-01-03 18:06:00	1.51041
	2022-01-03 18:26:00	1.44874
	2022-01-03 18:46:00	1.41201
	2022-01-03 19:06:00	1.40992
	2022-01-03 19:26:00	1.35808
	2022-01-03 19:46:00	1.29702
	2022-01-03 20:06:00	1.29211
	2022-01-03 20:26:00	1.30709
	2022-01-03 20:46:00	1.26504
	2022-01-03 21:06:00	1.2711
	2022-01-03 21:26:00	1.27307
	2022-01-03 21:46:00	1.25992
	2022-01-03 22:06:00	1.25501
	2022-01-03 22:26:00	1.26164
	2022-01-03 22:46:00	1.21935
	2022-01-03 23:06:00	1.23277
	2022-01-03 23:26:00	1.20845
	2022-01-03 23:46:00	1.25501
	2022-01-04 00:06:00	1.26041
	2022-01-04 00:11:18
	2022-01-04 00:16:35
	2022-01-04 00:21:53
	2022-01-04 00:27:11
	2022-01-04 00:56:00	1.44211
	2022-01-04 01:16:00	1.32319
	2022-01-04 01:36:00	1.27073
	2022-01-04 01:56:00	1.27331
	2022-01-04 02:16:00	1.28658
	2022-01-04 02:36:00	1.25918
	2022-01-04 02:56:00	1.26139
	2022-01-04 03:16:00	1.22161
	2022-01-04 03:36:00	1.26864
	2022-01-04 03:56:00	1.25931
	2022-01-04 04:16:00	1.28768
	2022-01-04 04:36:00	1.24665
	2022-01-04 04:56:00	1.24407
	2022-01-04 05:16:00	1.21734
	2022-01-04 05:36:00	1.21978
	2022-01-04 05:56:00	1.30464
	2022-01-04 06:16:00	1.26324
	2022-01-04 06:36:00	1.22575
	2022-01-04 06:56:00	1.22383
	2022-01-04 07:16:00	1.19533
	2022-01-04 07:36:00	1.18473
	2022-01-04 07:56:00	1.21972
	2022-01-04 08:16:00	1.23474
	2022-01-04 08:36:00	1.25587
	2022-01-04 08:56:00	1.21326
	2022-01-04 09:16:00	1.25623
	2022-01-04 09:36:00	1.25095
	2022-01-04 09:56:00	1.25746
	2022-01-04 10:16:00	1.26975
	2022-01-04 10:36:00	1.2969
	2022-01-04 10:56:00	1.24567
	2022-01-04 11:16:00	1.22787
	2022-01-04 11:36:00	1.26545
	2022-01-04 11:56:00	1.22477
	2022-01-04 12:16:00	1.21298
	2022-01-04 12:36:00	1.23437
	2022-01-04 12:56:00	1.21827
	2022-01-04 13:16:00	1.20182
	2022-01-04 13:36:00	1.23166
	2022-01-04 13:56:00	1.21172
	2022-01-04 14:16:00	1.2054
	2022-01-04 14:36:00	1.19463
	2022-01-04 14:56:00	1.21884
	2022-01-04 15:16:00	1.19737
	2022-01-04 15:36:00	1.19967
	2022-01-04 15:56:00	1.21877
	2022-01-04 16:16:00	1.15376
	2022-01-04 16:36:00	1.14277
	2022-01-04 16:56:00	1.15383
	2022-01-04 17:16:00	1.13868
	2022-01-04 17:36:00	1.16716
	2022-01-04 17:56:00	1.14545
	2022-01-04 18:16:00	1.1879
	2022-01-04 18:36:00	1.18182
	2022-01-04 18:56:00	1.20031
	2022-01-04 19:16:00	1.17867
	2022-01-04 19:36:00	1.18208
	2022-01-04 19:56:00	1.22583
	2022-01-04 20:16:00	1.19903
	2022-01-04 20:36:00	1.1901
	2022-01-04 20:56:00	1.1646
	2022-01-04 21:16:00	1.15709
	2022-01-04 21:36:00	1.10961
	2022-01-04 21:56:00	1.09331
	2022-01-04 22:16:00	1.1433
	2022-01-04 22:36:00	1.09418
	2022-01-04 22:56:00	1.12326
	2022-01-04 23:16:00	1.12689
	2022-01-04 23:36:00	1.12365
	2022-01-04 23:56:00	1.14046
	2022-01-05 00:02:00
	2022-01-05 00:07:18
	2022-01-05 00:12:37
	2022-01-05 00:17:56
	2022-01-05 00:46:00	1.2096
	2022-01-05 01:06:00	1.20684
	2022-01-05 01:26:00	1.20025
	2022-01-05 01:46:00	1.23596
	2022-01-05 02:06:00	1.22577
	2022-01-05 02:26:00	1.24026
	2022-01-05 02:46:00	1.23535
	2022-01-05 03:06:00	1.26238
	2022-01-05 03:26:00	1.28854
	2022-01-05 03:46:00	1.26889
	2022-01-05 04:06:00	1.27417
	2022-01-05 04:26:00	1.30144
	2022-01-05 04:46:00	1.27884
	2022-01-05 05:06:00	1.29653
	2022-01-05 05:26:00	1.27761
	2022-01-05 05:46:00	1.30181
	2022-01-05 06:06:00	1.28338
	2022-01-05 06:26:00	1.30046
	2022-01-05 06:46:00	1.31754
	2022-01-05 07:06:00	1.23732
	2022-01-05 07:26:00	1.27012
	2022-01-05 07:46:00	1.2609
	2022-01-05 08:06:00	1.39051
	2022-01-05 08:26:00	1.41311
	2022-01-05 08:46:00	1.45537
	2022-01-05 09:06:00	1.40967
	2022-01-05 09:26:00	1.39432
	2022-01-05 09:46:00	1.37589
	2022-01-05 10:06:00	1.39358
	2022-01-05 10:26:00	1.35144
	2022-01-05 10:46:00	1.37884
	2022-01-05 11:06:00	1.3496
	2022-01-05 11:26:00	1.35243
	2022-01-05 11:46:00	1.33547
	2022-01-05 12:06:00	1.3351
	2022-01-05 12:26:00	1.2942
	2022-01-05 12:46:00	1.35071
	2022-01-05 13:06:00	1.34764
	2022-01-05 13:26:00	1.3426
	2022-01-05 13:46:00	1.32098
	2022-01-05 14:06:00	1.32515
	2022-01-05 14:26:00	1.28879
	2022-01-05 14:46:00	1.29616
	2022-01-05 15:06:00	1.31692
	2022-01-05 15:26:00	1.25918
	2022-01-05 15:46:00	1.23031
	2022-01-05 16:06:00	1.22875
	2022-01-05 16:26:00	1.23891
	2022-01-05 16:46:00	1.19812
	2022-01-05 17:06:00	1.21341
	2022-01-05 17:26:00	1.17803
	2022-01-05 17:46:00	1.19878
	2022-01-05 18:06:00	1.16692
	2022-01-05 18:26:00	1.15999
	2022-01-05 18:46:00	1.18147
	2022-01-05 19:06:00	1.15127
	2022-01-05 19:26:00	1.17264
	2022-01-05 19:46:00	1.17299
	2022-01-05 20:06:00	1.16447
	2022-01-05 20:26:00	1.17566
	2022-01-05 20:46:00	1.14637
	2022-01-05 21:06:00	1.15562
	2022-01-05 21:26:00	1.12387
	2022-01-05 21:46:00	1.13623
	2022-01-05 22:06:00	1.10628
	2022-01-05 22:26:00	1.09986
	2022-01-05 22:46:00	1.11642
	2022-01-05 23:06:00	1.09052
	2022-01-05 23:26:00	1.07333
	2022-01-05 23:46:00	1.09325
	2022-01-06 00:06:00	1.057
	2022-01-06 00:11:18
	2022-01-06 00:16:36
	2022-01-06 00:21:55
	2022-01-06 00:27:13
	2022-01-06 00:56:00	1.104
	2022-01-06 01:16:00	1.06447
	2022-01-06 01:36:00	1.08633
	2022-01-06 01:56:00	1.04465
	2022-01-06 02:16:00	1.03037
	2022-01-06 02:36:00	1.00384
	2022-01-06 02:56:00	1.00686
	2022-01-06 03:16:00	1.03349
	2022-01-06 03:36:00	1.00819
	2022-01-06 03:56:00	1.03163
	2022-01-06 04:16:00	1.02304
	2022-01-06 04:36:00	1.07608
	2022-01-06 04:56:00	1.06796
	2022-01-06 05:16:00	1.07576
	2022-01-06 05:36:00	1.08933
	2022-01-06 05:56:00	1.06702
	2022-01-06 06:16:00	1.07847
	2022-01-06 06:36:00	1.09944
	2022-01-06 07:06:00	1.22291
	2022-01-06 07:26:00	1.16115
	2022-01-06 07:46:00	1.20382
	2022-01-06 08:06:00	1.17341
	2022-01-06 08:26:00	1.21043
	2022-01-06 08:46:00	1.20031
	2022-01-06 09:06:00	1.22153
	2022-01-06 09:26:00	1.23695
	2022-01-06 09:46:00	1.1779
	2022-01-06 10:06:00	1.21398
	2022-01-06 10:26:00	1.20819
	2022-01-06 10:46:00	1.22664
	2022-01-06 11:06:00	1.20716
	2022-01-06 11:26:00	1.23228
	2022-01-06 11:46:00	1.19172
	2022-01-06 12:06:00	1.19933
	2022-01-06 12:26:00	1.19571
	2022-01-06 12:46:00	1.17569
	2022-01-06 13:06:00	1.1892
	2022-01-06 13:26:00	1.16241
	2022-01-06 13:46:00	1.12465
	2022-01-06 14:06:00	1.12599
	2022-01-06 14:26:00	1.1155
	2022-01-06 14:46:00	1.10847
	2022-01-06 15:06:00	1.06449
	2022-01-06 15:26:00	1.09984
	2022-01-06 15:46:00	1.0991
	2022-01-06 16:06:00	1.10648
	2022-01-06 16:26:00	1.12929
	2022-01-06 16:46:00	1.11417
	2022-01-06 17:06:00	1.10696
	2022-01-06 17:26:00	1.04602
	2022-01-06 17:46:00	1.05365
	2022-01-06 18:06:00	1.07277
	2022-01-06 18:26:00	1.05259
	2022-01-06 18:46:00	1.04145
	2022-01-06 19:06:00	1.06407
	2022-01-06 19:26:00	1.01726
	2022-01-06 19:46:00	1.01643
	2022-01-06 20:06:00	1.04997
	2022-01-06 20:26:00	1.00073
	2022-01-06 20:46:00	0.987312
	2022-01-06 21:06:00	0.953143
	2022-01-06 21:26:00	0.954361
	2022-01-06 21:46:00	0.954857
	2022-01-06 22:06:00	0.960102
	2022-01-06 22:26:00	0.94492
	2022-01-06 22:46:00	0.994787
	2022-01-06 23:06:00	0.986613
	2022-01-06 23:26:00	0.986108
	2022-01-06 23:46:00	0.955167
	2022-01-07 00:06:00	0.980938
	2022-01-07 00:11:18
	2022-01-07 00:16:37
	2022-01-07 00:21:55
	2022-01-07 00:27:14
	2022-01-07 00:56:00	1.03464
	2022-01-07 01:16:00	1.00195
	2022-01-07 01:36:00	0.98562
	2022-01-07 01:56:00	0.983453
	2022-01-07 02:16:00	1.01016
	2022-01-07 02:36:00	0.99831
	2022-01-07 02:56:00	0.993068
	2022-01-07 03:16:00	1.04008
	2022-01-07 03:36:00	1.01891
	2022-01-07 03:56:00	1.03639
	2022-01-07 04:16:00	1.06321
	2022-01-07 04:36:00	1.04767
	2022-01-07 04:56:00	1.0743
	2022-01-07 05:16:00	1.06049
	2022-01-07 05:36:00	1.04137
	2022-01-07 05:56:00	1.08476
	2022-01-07 06:16:00	1.01372
	2022-01-07 06:36:00	1.01989
	2022-01-07 06:56:00	0.990319
	2022-01-07 07:16:00	0.985394
	2022-01-07 07:36:00	0.97955
	2022-01-07 07:56:00	0.95478
	2022-01-07 08:16:00	0.979871
	2022-01-07 08:36:00	0.970294
	2022-01-07 08:56:00	0.915824
	2022-01-07 09:16:00	0.92471
	2022-01-07 09:36:00	0.965967
	2022-01-07 09:56:00	1.01816
	2022-01-07 10:16:00	1.00019
	2022-01-07 10:36:00	0.999566
	2022-01-07 10:56:00	0.895089
	2022-01-07 11:16:00	0.868651
	2022-01-07 11:36:00	0.835934
	2022-01-07 11:56:00	0.807934
	2022-01-07 12:16:00	0.818571
	2022-01-07 12:36:00	0.802828
	2022-01-07 12:56:00	0.791846
	2022-01-07 13:16:00	0.814512
	2022-01-07 13:36:00	0.875865
	2022-01-07 13:56:00	0.893038
	2022-01-07 14:16:00	0.915813
	2022-01-07 14:36:00	0.944568
	2022-01-07 14:56:00	0.99586
	2022-01-07 15:16:00	1.16155
	2022-01-07 15:36:00	1.24911
	2022-01-07 15:56:00	1.23228
	2022-01-07 16:16:00	1.23437
	2022-01-07 16:36:00	1.28484
	2022-01-07 16:56:00	1.2539
	2022-01-07 17:16:00	1.27024
	2022-01-07 17:36:00	1.22652
	2022-01-07 17:56:00	1.22833
	2022-01-07 18:16:00	1.2324
	2022-01-07 18:36:00	1.19275
	2022-01-07 18:56:00	1.17093
	2022-01-07 19:16:00	1.18073
	2022-01-07 19:36:00	1.16572
	2022-01-07 19:56:00	1.1875
	2022-01-07 20:16:00	1.1444
	2022-01-07 20:36:00	1.10067
	2022-01-07 20:56:00	1.06469
	2022-01-07 21:16:00	1.03595
	2022-01-07 21:36:00	1.00821
	2022-01-07 21:56:00	1.02039
	2022-01-07 22:16:00	1.01044
	2022-01-07 22:36:00	0.996627
	2022-01-07 22:56:00	1.01179
	2022-01-07 23:16:00	1.0156
	2022-01-07 23:36:00	1.06273
	2022-01-07 23:56:00	1.11384
	2022-01-08 00:02:00
	2022-01-08 00:07:19
	2022-01-08 00:12:38
	2022-01-08 00:17:57
	2022-01-08 00:46:00	1.07691
	2022-01-08 01:06:00	1.02164
	2022-01-08 01:26:00	0.991721
	2022-01-08 01:46:00	0.988194
	2022-01-08 02:06:00	0.984042
	2022-01-08 02:26:00	0.986903
	2022-01-08 02:46:00	0.986411
	2022-01-08 03:06:00	1.11377
	2022-01-08 03:26:00	1.17396
	2022-01-08 03:46:00	1.0368
	2022-01-08 04:06:00	1.04898
	2022-01-08 04:26:00	1.04475
	2022-01-08 04:46:00	1.05394
	2022-01-08 05:06:00	1.11184
	2022-01-08 05:26:00	1.10879
	2022-01-08 05:46:00	1.0894
	2022-01-08 06:06:00	1.07251
	2022-01-08 06:26:00	0.981707
	2022-01-08 06:46:00	0.941621
	2022-01-08 07:06:00	0.913667
	2022-01-08 07:26:00	0.901528
	2022-01-08 07:46:00	0.918187
	2022-01-08 08:06:00	0.945046
	2022-01-08 08:26:00	0.950932
	2022-01-08 08:46:00	0.967151
	2022-01-08 09:06:00	0.955851
	2022-01-08 09:26:00	0.936605
	2022-01-08 09:46:00	0.971433
	2022-01-08 10:06:00	0.902935
	2022-01-08 10:26:00	0.910365
	2022-01-08 10:46:00	0.964048
	2022-01-08 11:06:00	0.976953
	2022-01-08 11:26:00	0.98176
	2022-01-08 11:46:00	0.965214
	2022-01-08 12:06:00	0.960204
	2022-01-08 12:26:00	0.970934
	2022-01-08 12:46:00	0.979436
	2022-01-08 13:06:00	1.02242
	2022-01-08 13:26:00	1.00767
	2022-01-08 13:46:00	1.02998
	2022-01-08 14:06:00	1.0491
	2022-01-08 14:26:00	1.07161
	2022-01-08 14:46:00	1.03043
	2022-01-08 15:06:00	1.0596
	2022-01-08 15:26:00	1.01311
	2022-01-08 15:46:00	0.995854
	2022-01-08 16:06:00	1.04559
	2022-01-08 16:26:00	1.0323
	2022-01-08 16:46:00	1.12476
	2022-01-08 17:06:00	1.22921
	2022-01-08 17:26:00	1.41928
	2022-01-08 17:46:00	1.34039
	2022-01-08 18:06:00	1.0688
	2022-01-08 18:26:00	1.03355
	2022-01-08 18:46:00	1.00594
	2022-01-08 19:06:00	0.937579
	2022-01-08 19:26:00	0.899464
	2022-01-08 19:46:00	0.885552
	2022-01-08 20:06:00	0.878344
	2022-01-08 20:26:00	0.934512
	2022-01-08 20:46:00	1.00842
	2022-01-08 21:06:00	1.12369
	2022-01-08 21:26:00	1.05809
	2022-01-08 21:46:00	0.984687
	2022-01-08 22:06:00	0.996911
	2022-01-08 22:26:00	0.975785
	2022-01-08 23:26:00	1.08242
	2022-01-08 23:46:00	0.910817
	2022-01-09 00:06:00	0.888329
	2022-01-09 00:11:18
	2022-01-09 00:16:36
	2022-01-09 00:21:54
	2022-01-09 00:27:12
	2022-01-09 00:56:00	0.951315
	2022-01-09 01:16:00	0.94
	2022-01-09 01:36:00	0.945392
	2022-01-09 01:56:00	1.09518
	2022-01-09 02:16:00	1.13136
	2022-01-09 02:36:00	1.01186
	2022-01-09 02:56:00	1.00633
	2022-01-09 03:16:00	1.00336
	2022-01-09 03:36:00	1.0055
	2022-01-09 03:56:00	0.947867
	2022-01-09 04:16:00	0.954571
	2022-01-09 04:36:00	0.993908
	2022-01-09 04:56:00	0.919737
	2022-01-09 05:16:00	0.945213
	2022-01-09 05:36:00	0.971938
	2022-01-09 05:56:00	0.957268
	2022-01-09 06:16:00	0.950468
	2022-01-09 06:36:00	1.06387
	2022-01-09 06:56:00	1.14891
	2022-01-09 07:16:00	1.19727
	2022-01-09 07:36:00	1.09548
	2022-01-09 07:56:00	1.05622
	2022-01-09 08:16:00	1.16908
	2022-01-09 08:36:00	1.1714
	2022-01-09 08:56:00	1.16528
	2022-01-09 09:16:00	1.19546
	2022-01-09 09:36:00	1.16111
	2022-01-09 09:56:00	1.23117
	2022-01-09 10:16:00	1.17363
	2022-01-09 10:36:00	1.19975
	2022-01-09 10:56:00	1.20336
	2022-01-09 11:16:00	1.23379
	2022-01-09 11:36:00	1.18863
	2022-01-09 11:56:00	1.18774
	2022-01-09 12:16:00	1.20755
	2022-01-09 12:36:00	1.17907
	2022-01-09 12:56:00	1.16545
	2022-01-09 13:16:00	1.12535
	2022-01-09 13:36:00	1.12262
	2022-01-09 13:56:00	1.11086
	2022-01-09 14:16:00	1.06157
	2022-01-09 14:36:00	1.05947
	2022-01-09 14:56:00	0.98351
	2022-01-09 15:16:00	0.989956
	2022-01-09 15:36:00	1.05858
	2022-01-09 15:56:00	1.02022
	2022-01-09 16:16:00	1.04222
	2022-01-09 16:36:00	1.2144
	2022-01-09 16:56:00	1.19412
	2022-01-09 17:16:00	1.14607
	2022-01-09 17:36:00	1.02153
	2022-01-09 17:56:00	1.0465
	2022-01-09 18:16:00	1.12796
	2022-01-09 18:36:00	1.08974
	2022-01-09 18:56:00	1.12022
	2022-01-09 19:16:00	1.10982
	2022-01-09 19:36:00	1.09635
	2022-01-09 19:56:00	1.07766
	2022-01-09 20:16:00	1.11696
	2022-01-09 20:36:00	1.09154
	2022-01-09 20:56:00	1.04577
	2022-01-09 21:16:00	1.05875
	2022-01-09 21:36:00	1.04201
	2022-01-09 21:56:00	1.03886
	2022-01-09 22:16:00	1.04756
	2022-01-09 22:36:00	1.02023
	2022-01-09 22:56:00	1.02495
	2022-01-09 23:16:00	1.0015
	2022-01-09 23:36:00	0.988822
	2022-01-09 23:56:00	1.04385
	2022-01-10 00:02:00
	2022-01-10 00:07:19
	2022-01-10 00:12:38
	2022-01-10 00:17:57
	2022-01-10 00:46:00	0.88731
	2022-01-10 01:06:00	0.997225
	2022-01-10 01:26:00	0.972032
	2022-01-10 01:46:00	0.981408
	2022-01-10 02:06:00	1.06652
	2022-01-10 02:26:00	1.10497
	2022-01-10 02:46:00	1.04327
	2022-01-10 03:06:00	1.05977
	2022-01-10 03:26:00	0.9404
	2022-01-10 03:46:00	0.947219
	2022-01-10 04:06:00	0.922861
	2022-01-10 04:26:00	0.920803
	2022-01-10 04:46:00	0.927069
	2022-01-10 05:06:00	0.877225
	2022-01-10 05:26:00	0.88669
	2022-01-10 05:46:00	0.901833
	2022-01-10 06:06:00	0.845851
	2022-01-10 06:26:00	0.892229
	2022-01-10 06:46:00	0.817961
	2022-01-10 07:06:00	0.826413
	2022-01-10 07:26:00	0.904277
	2022-01-10 07:46:00	0.880929
	2022-01-10 08:06:00	0.837358
	2022-01-10 08:26:00	0.861389
	2022-01-10 08:46:00	0.907001
	2022-01-10 09:06:00	0.890774
	2022-01-10 09:26:00	0.914583
	2022-01-10 09:46:00	0.948323
	2022-01-10 10:06:00	1.01423
	2022-01-10 10:26:00	0.982713
	2022-01-10 10:46:00	0.991774
	2022-01-10 11:06:00	1.02501
	2022-01-10 11:26:00	0.986076
	2022-01-10 11:46:00	0.976552
	2022-01-10 12:06:00	0.974638
	2022-01-10 12:26:00	0.935656
	2022-01-10 12:46:00	0.968114
	2022-01-10 13:06:00	1.01866
	2022-01-10 13:26:00	1.0189
	2022-01-10 13:46:00	1.01243
	2022-01-10 14:06:00	1.00681
	2022-01-10 14:26:00	1.05345
	2022-01-10 14:46:00	1.05797
	2022-01-10 15:06:00	1.0207
	2022-01-10 15:26:00	1.04161
	2022-01-10 15:46:00	1.04015
	2022-01-10 16:06:00	0.990224
	2022-01-10 16:26:00	1.04712
	2022-01-10 16:46:00	0.989518
	2022-01-10 17:06:00	1.00414
	2022-01-10 17:26:00	1.00607
	2022-01-10 17:46:00	0.970223
	2022-01-10 18:06:00	0.987866
	2022-01-10 18:26:00	1.00053
	2022-01-10 18:46:00	1.07032
	2022-01-10 19:06:00	1.06659
	2022-01-10 19:26:00	1.10874
	2022-01-10 19:46:00	1.0079
	2022-01-10 20:06:00	1.00491
	2022-01-10 20:26:00	1.00886
	2022-01-10 20:46:00	1.08253
	2022-01-10 21:06:00	1.03972
	2022-01-10 21:26:00	1.07637
	2022-01-10 21:46:00	0.965797
	2022-01-10 22:06:00	1.00488
	2022-01-10 22:26:00	1.0445
	2022-01-10 22:46:00	0.959303
	2022-01-10 23:06:00	0.944723
	2022-01-10 23:26:00	0.946718
	2022-01-10 23:46:00	0.939077
	2022-01-11 00:06:00	0.938257
	2022-01-11 00:11:18
	2022-01-11 00:16:36
	2022-01-11 00:21:54
	2022-01-11 00:27:13
	2022-01-11 00:56:00	0.938091
	2022-01-11 01:16:00	0.950552
	2022-01-11 01:36:00	0.898129
	2022-01-11 01:56:00	1.00287
	2022-01-11 02:16:00	1.02256
	2022-01-11 02:36:00	0.919
	2022-01-11 02:56:00	0.956524
	2022-01-11 03:16:00	0.981527
	2022-01-11 03:36:00	0.936483
	2022-01-11 03:56:00	0.973102
	2022-01-11 04:16:00	0.949616
	2022-01-11 04:36:00	0.954322
	2022-01-11 04:56:00	0.885145
	2022-01-11 05:16:00	0.887877
	2022-01-11 05:36:00	0.889186
	2022-01-11 05:56:00	0.942598
	2022-01-11 06:16:00	0.977437
	2022-01-11 06:36:00	0.907979
	2022-01-11 06:56:00	0.994246
	2022-01-11 07:16:00	0.961032
	2022-01-11 07:36:00	0.914494
	2022-01-11 07:56:00	0.909113
	2022-01-11 08:16:00	0.908889
	2022-01-11 08:36:00	0.945059
	2022-01-11 08:56:00	0.980622
	2022-01-11 09:16:00	0.980807
	2022-01-11 09:36:00	0.981658
	2022-01-11 09:56:00	0.997824
	2022-01-11 10:16:00	1.06604
	2022-01-11 10:36:00	1.03004
	2022-01-11 10:56:00	1.06189
	2022-01-11 11:16:00	1.07414
	2022-01-11 11:36:00	1.09768
	2022-01-11 11:56:00	1.03711
	2022-01-11 12:16:00	1.04611
	2022-01-11 12:36:00	1.00881
	2022-01-11 12:56:00	1.01374
	2022-01-11 13:16:00	1.02831
	2022-01-11 13:36:00	1.0063
	2022-01-11 13:56:00	1.09831
	2022-01-11 14:16:00	1.0198
	2022-01-11 14:36:00	1.1024
	2022-01-11 14:56:00	1.08788
	2022-01-11 15:16:00	1.06398
	2022-01-11 15:36:00	1.06396
	2022-01-11 15:56:00	1.05398
	2022-01-11 16:16:00	1.0514
	2022-01-11 16:36:00	1.05045
	2022-01-11 16:56:00	1.09023
	2022-01-11 17:16:00	1.0663
	2022-01-11 17:36:00	1.07824
	2022-01-11 17:56:00	1.03681
	2022-01-11 18:16:00	1.04171
	2022-01-11 18:36:00	0.995962
	2022-01-11 18:56:00	0.99186
	2022-01-11 19:16:00	1.00251
	2022-01-11 19:36:00	0.971143
	2022-01-11 19:56:00	0.989804
	2022-01-11 20:16:00	0.984859
	2022-01-11 20:36:00	0.974998
	2022-01-11 20:56:00	0.983269
	2022-01-11 21:16:00	1.00063
	2022-01-11 21:36:00	0.984419
	2022-01-11 21:56:00	0.996614
	2022-01-11 22:16:00	1.00864
	2022-01-11 22:36:00	0.979665
	2022-01-11 22:56:00	0.975624
	2022-01-11 23:16:00	0.972216
	2022-01-11 23:36:00	0.94044
	2022-01-11 23:56:00	0.970514
	2022-01-12 00:02:00
	2022-01-12 00:07:18
	2022-01-12 00:12:37
	2022-01-12 00:17:56
	2022-01-12 00:46:00	0.980421
	2022-01-12 01:06:00	0.959927
	2022-01-12 01:26:00	0.939095
	2022-01-12 01:46:00	0.905873
	2022-01-12 02:06:00	0.945828
	2022-01-12 02:26:00	0.933558
	2022-01-12 02:46:00	0.940386
	2022-01-12 03:06:00	0.941624
	2022-01-12 03:26:00	0.920456
	2022-01-12 03:46:00	0.927139
	2022-01-12 04:06:00	0.965098
	2022-01-12 04:26:00	0.974554
	2022-01-12 04:46:00	0.957294
	2022-01-12 05:06:00	1.00108
	2022-01-12 05:26:00	0.978962
	2022-01-12 05:46:00	0.951988
	2022-01-12 06:06:00	0.966277
	2022-01-12 06:26:00	0.973625
	2022-01-12 06:46:00	0.986124
	2022-01-12 07:06:00	0.975261
	2022-01-12 07:26:00	0.970202
	2022-01-12 07:46:00	1.00584
	2022-01-12 08:06:00	1.00591
	2022-01-12 08:26:00	1.00121
	2022-01-12 08:46:00	0.922925
	2022-01-12 09:06:00	0.947985
	2022-01-12 09:26:00	1.01277
	2022-01-12 09:46:00	1.06833
	2022-01-12 10:06:00	1.03659
	2022-01-12 10:26:00	1.06228
	2022-01-12 10:46:00	1.05593
	2022-01-12 11:06:00	1.04512
	2022-01-12 11:26:00	1.06064
	2022-01-12 11:46:00	1.05504
	2022-01-12 12:06:00	1.0534
	2022-01-12 12:26:00	1.04079
	2022-01-12 12:46:00	1.02755
	2022-01-12 13:06:00	0.956809
	2022-01-12 13:26:00	1.00426
	2022-01-12 13:46:00	0.935882
	2022-01-12 14:06:00	0.992583
	2022-01-12 14:26:00	0.964531
	2022-01-12 14:46:00	0.995836
	2022-01-12 15:06:00	1.00207
	2022-01-12 15:26:00	0.951894
	2022-01-12 15:46:00	0.993277
	2022-01-12 16:06:00	1.07855
	2022-01-12 16:26:00	1.04593
	2022-01-12 16:46:00	1.01278
	2022-01-12 17:06:00	0.991471
	2022-01-12 17:26:00	0.993027
	2022-01-12 17:46:00	1.00124
	2022-01-12 18:06:00	1.05127
	2022-01-12 18:26:00	0.955093
	2022-01-12 18:46:00	0.844205
	2022-01-12 19:06:00	0.864261
	2022-01-12 19:26:00	0.829357
	2022-01-12 19:46:00	0.816877
	2022-01-12 20:06:00	0.814405
	2022-01-12 20:26:00	0.814603
	2022-01-12 20:46:00	0.859747
	2022-01-12 21:06:00	0.928881
	2022-01-12 21:26:00	0.929963
	2022-01-12 21:46:00	0.936143
	2022-01-12 22:06:00	0.919914
	2022-01-12 22:26:00	0.885558
	2022-01-12 22:46:00	0.922861
	2022-01-12 23:06:00	0.892899
	2022-01-12 23:26:00	0.856219
	2022-01-12 23:46:00	0.855363
	2022-01-13 00:06:00	0.853322
	2022-01-13 00:11:18
	2022-01-13 00:16:36
	2022-01-13 00:21:54
	2022-01-13 00:27:12
	2022-01-13 00:56:00	0.851547
	2022-01-13 01:16:00	0.851396
	2022-01-13 01:36:00	0.838467
	2022-01-13 01:56:00	0.842937
	2022-01-13 02:16:00	0.843574
	2022-01-13 02:36:00	0.85877
	2022-01-13 02:56:00	0.881775
	2022-01-13 03:16:00	0.88501
	2022-01-13 03:36:00	0.881838
	2022-01-13 03:56:00	0.922145
	2022-01-13 04:16:00	0.922938
	2022-01-13 04:36:00	0.897091
	2022-01-13 04:56:00	0.896602
	2022-01-13 05:16:00	0.892431
	2022-01-13 05:36:00	0.930609
	2022-01-13 05:56:00	0.964461
	2022-01-13 06:16:00	0.975555
	2022-01-13 06:36:00	0.958037
	2022-01-13 06:56:00	1.00215
	2022-01-13 07:16:00	0.963801
	2022-01-13 07:36:00	0.895007
	2022-01-13 07:56:00	0.851245
	2022-01-13 08:16:00	0.843663
	2022-01-13 08:36:00	0.789226
	2022-01-13 08:56:00	0.738796
	2022-01-13 09:16:00	0.756048
	2022-01-13 09:36:00	0.709803
	2022-01-13 09:56:00	0.715744
	2022-01-13 10:16:00	0.766341
	2022-01-13 10:36:00	0.786501
	2022-01-13 10:56:00	0.816624
	2022-01-13 11:16:00	0.865354
	2022-01-13 11:36:00	0.869499
	2022-01-13 11:56:00	0.896817
	2022-01-13 12:16:00	0.94306
	2022-01-13 12:36:00	0.982252
	2022-01-13 12:56:00	1.00464
	2022-01-13 13:16:00	0.981161
	2022-01-13 13:36:00	0.929156
	2022-01-13 13:56:00	0.948995
	2022-01-13 14:16:00	0.935392
	2022-01-13 14:36:00	0.872143
	2022-01-13 14:56:00	0.908667
	2022-01-13 15:16:00	0.882754
	2022-01-13 15:36:00	0.859919
	2022-01-13 15:56:00	0.825925
	2022-01-13 16:16:00	0.806798
	2022-01-13 16:36:00	0.84617
	2022-01-13 16:56:00	0.786765
	2022-01-13 17:16:00	0.788668
	2022-01-13 17:36:00	0.802228
	2022-01-13 17:56:00	0.869856
	2022-01-13 18:16:00	0.876627
	2022-01-13 18:36:00	0.893085
	2022-01-13 18:56:00	0.914244
	2022-01-13 19:16:00	0.923979
	2022-01-13 19:36:00	0.928504
	2022-01-13 19:56:00	0.910978
	2022-01-13 20:16:00	0.88232
	2022-01-13 20:36:00	0.838491
	2022-01-13 20:56:00	0.836132
	2022-01-13 21:16:00	0.86464
	2022-01-13 21:36:00	0.899407
	2022-01-13 21:56:00	0.888605
	2022-01-13 22:16:00	0.886419
	2022-01-13 22:36:00	0.840905
	2022-01-13 22:56:00	0.869828
	2022-01-13 23:16:00	0.690271
	2022-01-13 23:36:00	0.593648
	2022-01-13 23:56:00	0.675608
	2022-01-14 00:02:00
	2022-01-14 00:07:18
	2022-01-14 00:12:36
	2022-01-14 00:17:54
	2022-01-14 00:46:00	0.755344
	2022-01-14 01:06:00	0.803522
	2022-01-14 01:26:00	0.751899
	2022-01-14 01:46:00	0.757579
	2022-01-14 02:06:00	0.835458
	2022-01-14 02:26:00	0.787341
	2022-01-14 02:46:00	0.816547
	2022-01-14 03:06:00	0.803872
	2022-01-14 03:26:00	0.747737
	2022-01-14 03:46:00	0.726424
	2022-01-14 04:06:00	0.765563
	2022-01-14 04:26:00	0.797096
	2022-01-14 04:46:00	0.806446
	2022-01-14 05:06:00	0.699305
	2022-01-14 05:26:00	0.633645
	2022-01-14 05:46:00	0.560877
	2022-01-14 06:06:00	0.623664
	2022-01-14 06:26:00	0.699074
	2022-01-14 06:46:00	0.724589
	2022-01-14 07:06:00	0.758946
	2022-01-14 07:26:00	0.760469
	2022-01-14 07:46:00	0.744534
	2022-01-14 08:06:00	0.761042
	2022-01-14 08:26:00	0.797722
	2022-01-14 08:46:00	0.749406
	2022-01-14 09:06:00	0.770137
	2022-01-14 09:26:00	0.736062
	2022-01-14 09:46:00	0.784015
	2022-01-14 10:06:00	0.785592
	2022-01-14 10:26:00	0.741622
	2022-01-14 10:46:00	0.719092
	2022-01-14 11:06:00	0.693027
	2022-01-14 11:26:00	0.765373
	2022-01-14 11:46:00	0.738395
	2022-01-14 12:06:00	0.720371
	2022-01-14 12:26:00	0.735043
	2022-01-14 12:46:00	0.750415
	2022-01-14 13:06:00	0.751474
	2022-01-14 13:26:00	0.714417
	2022-01-14 13:46:00	0.689369
	2022-01-14 14:06:00	0.642154
	2022-01-14 14:26:00	0.706717
	2022-01-14 14:46:00	0.635317
	2022-01-14 15:06:00	0.648554
	2022-01-14 15:26:00	0.65887
	2022-01-14 15:46:00	0.690012
	2022-01-14 16:06:00	0.754502
	2022-01-14 16:26:00	0.705586
	2022-01-14 16:46:00	0.676771
	2022-01-14 17:06:00	0.668734
	2022-01-14 17:26:00	0.669361
	2022-01-14 17:46:00	0.69356
	2022-01-14 18:06:00	0.659777
	2022-01-14 18:26:00	0.60743
	2022-01-14 18:46:00	0.609819
	2022-01-14 19:06:00	0.598612
	2022-01-14 19:26:00	0.673483
	2022-01-14 19:46:00	0.563722
	2022-01-14 20:06:00	0.513796
	2022-01-14 20:26:00	0.549131
	2022-01-14 20:46:00	0.538367
	2022-01-14 21:06:00	0.498925
	2022-01-14 21:26:00	0.519034
	2022-01-14 21:46:00	0.475769
	2022-01-14 22:06:00	0.480079
	2022-01-14 22:26:00	0.470956
	2022-01-14 22:46:00	0.630248
	2022-01-14 23:06:00	0.557624
	2022-01-14 23:26:00	0.561711
	2022-01-14 23:46:00	0.773978
	2022-01-15 00:06:00	0.727711
	2022-01-15 00:11:17
	2022-01-15 00:16:35
	2022-01-15 00:21:53
	2022-01-15 00:27:10
	2022-01-15 00:56:00	0.681677
	2022-01-15 01:16:00	0.632616
	2022-01-15 01:36:00	0.655963
	2022-01-15 01:56:00	0.624938
	2022-01-15 02:16:00	0.618618
	2022-01-15 02:36:00	0.632359
	2022-01-15 02:56:00	0.850566
	2022-01-15 03:16:00	0.816611
	2022-01-15 03:36:00	0.791968
	2022-01-15 03:56:00	0.809394
	2022-01-15 04:16:00	0.804454
	2022-01-15 04:36:00	0.762655
	2022-01-15 04:56:00	0.689747
	2022-01-15 05:16:00	0.735689
	2022-01-15 05:36:00	0.798682
	2022-01-15 05:56:00	0.878599
	2022-01-15 06:16:00	0.894597
	2022-01-15 06:36:00	0.897497
	2022-01-15 06:56:00	0.825336
	2022-01-15 07:16:00	1.01942
	2022-01-15 07:36:00	1.04623
	2022-01-15 07:56:00	0.96971
	2022-01-15 08:16:00	1.02981
	2022-01-15 08:36:00	0.984431
	2022-01-15 08:56:00	0.930339
	2022-01-15 09:16:00	0.945973
	2022-01-15 09:36:00	1.11183
	2022-01-15 09:56:00	1.01985
	2022-01-15 10:16:00	1.05477
	2022-01-15 10:36:00	1.01849
	2022-01-15 10:56:00	1.00469
	2022-01-15 11:16:00	1.0544
	2022-01-15 11:36:00	0.966466
	2022-01-15 11:56:00	1.04743
	2022-01-15 12:16:00	0.959268
	2022-01-15 12:36:00	0.999961
	2022-01-15 12:56:00	0.962462
	2022-01-15 13:16:00	0.952774
	2022-01-15 13:36:00	0.873347
	2022-01-15 13:56:00	0.88245
	2022-01-15 14:16:00	0.857758
	2022-01-15 14:36:00	0.842515
	2022-01-15 14:56:00	0.866194
	2022-01-15 15:16:00	0.817681
	2022-01-15 15:36:00	0.839328
	2022-01-15 15:56:00	0.804752
	2022-01-15 16:16:00	0.762948
	2022-01-15 16:36:00	0.762712
	2022-01-15 16:56:00	0.779235
	2022-01-15 17:16:00	0.738792
	2022-01-15 17:36:00	0.737684
	2022-01-15 17:56:00	0.692289
	2022-01-15 18:16:00	0.714736
	2022-01-15 18:36:00	0.692738
	2022-01-15 18:56:00	0.724433
	2022-01-15 19:16:00	0.704146
	2022-01-15 19:36:00	0.740196
	2022-01-15 19:56:00	0.695738
	2022-01-15 20:16:00	0.658355
	2022-01-15 20:36:00	0.631267
	2022-01-15 20:56:00	0.696316
	2022-01-15 21:16:00	0.681724
	2022-01-15 21:36:00	0.716741
	2022-01-15 21:56:00	0.725304
	2022-01-15 22:16:00	0.739266
	2022-01-15 22:36:00	0.698755
	2022-01-15 22:56:00	0.737086
	2022-01-15 23:16:00	0.662507
	2022-01-15 23:36:00	0.709225
	2022-01-15 23:56:00	0.666444
	2022-01-16 00:02:00
	2022-01-16 00:07:18
	2022-01-16 00:12:36
	2022-01-16 00:17:54
	2022-01-16 00:46:00	0.886635
	2022-01-16 01:06:00	0.768172
	2022-01-16 01:26:00	0.979007
	2022-01-16 01:46:00	0.825155
	2022-01-16 02:06:00	1.25987
	2022-01-16 02:26:00	0.801627
	2022-01-16 02:46:00	0.8287
	2022-01-16 03:06:00	0.774551
	2022-01-16 03:26:00	0.792001
	2022-01-16 03:46:00	0.789432
	2022-01-16 04:06:00	0.788691
	2022-01-16 04:26:00	0.837733
	2022-01-16 04:46:00	0.844756
	2022-01-16 05:06:00	0.825797
	2022-01-16 05:26:00	0.854042
	2022-01-16 05:46:00	0.849491
	2022-01-16 06:06:00	0.914916
	2022-01-16 06:26:00	0.898554
	2022-01-16 06:46:00	0.900706
	2022-01-16 07:06:00	0.905433
	2022-01-16 07:26:00	0.947398
	2022-01-16 07:46:00	0.953007
	2022-01-16 08:06:00	0.969354
	2022-01-16 08:26:00	0.998023
	2022-01-16 08:46:00	0.981004
	2022-01-16 09:06:00	0.978781
	2022-01-16 09:26:00	0.946028
	2022-01-16 09:46:00	0.940225
	2022-01-16 10:06:00	0.94016
	2022-01-16 10:26:00	0.959046
	2022-01-16 10:46:00	1.01234
	2022-01-16 11:06:00	0.959968
	2022-01-16 11:26:00	0.958959
	2022-01-16 11:46:00	1.01124
	2022-01-16 12:06:00	1.02057
	2022-01-16 12:26:00	1.01524
	2022-01-16 12:46:00	1.02538
	2022-01-16 13:06:00	0.915273
	2022-01-16 13:26:00	0.820806
	2022-01-16 13:46:00	0.853223
	2022-01-16 14:06:00	0.819188
	2022-01-16 14:26:00	0.84574
	2022-01-16 14:46:00	0.859658
	2022-01-16 15:06:00	0.619861
	2022-01-16 15:26:00	0.582437
	2022-01-16 15:46:00	0.597236
	2022-01-16 16:06:00	0.591717
	2022-01-16 16:26:00	0.5697
	2022-01-16 16:46:00	0.560938
	2022-01-16 17:06:00	0.551192
	2022-01-16 17:26:00	0.601273
	2022-01-16 17:46:00	0.567355
	2022-01-16 18:06:00	0.535004
	2022-01-16 18:26:00	0.552201
	2022-01-16 18:46:00	0.572193
	2022-01-16 19:06:00	0.543187
	2022-01-16 19:26:00	0.623304
	2022-01-16 19:46:00	0.616437
	2022-01-16 20:06:00	0.676052
	2022-01-16 20:26:00	0.718465
	2022-01-16 20:46:00	0.737111
	2022-01-16 21:06:00	0.711961
	2022-01-16 21:26:00	0.65772
	2022-01-16 21:46:00	0.658372
	2022-01-16 22:06:00	0.653183
	2022-01-16 22:26:00	0.648659
	2022-01-16 22:46:00	0.644362
	2022-01-16 23:06:00	0.660953
	2022-01-16 23:26:00	0.649833
	2022-01-16 23:46:00	0.598044
	2022-01-17 00:06:00	0.509381
	2022-01-17 00:11:18
	2022-01-17 00:16:36
	2022-01-17 00:21:54
	2022-01-17 00:27:12
	2022-01-17 00:56:00	0.497874
	2022-01-17 01:16:00	0.483629
	2022-01-17 01:36:00	0.516796
	2022-01-17 01:56:00	0.524719
	2022-01-17 02:16:00	0.542651
	2022-01-17 02:36:00	0.531361
	2022-01-17 02:56:00	0.549567
	2022-01-17 03:16:00	0.53808
	2022-01-17 03:36:00	0.55506
	2022-01-17 03:56:00	0.581159
	2022-01-17 04:16:00	0.578053
	2022-01-17 04:36:00	0.570626
	2022-01-17 04:56:00	0.60078
	2022-01-17 05:16:00	0.563269
	2022-01-17 05:36:00	0.580954
	2022-01-17 05:56:00	0.581407
	2022-01-17 06:16:00	0.567425
	2022-01-17 06:36:00	0.621055
	2022-01-17 06:56:00	0.63316
	2022-01-17 07:16:00	0.630837
	2022-01-17 07:36:00	0.623934
	2022-01-17 07:56:00	0.57855
	2022-01-17 08:16:00	0.646651
	2022-01-17 08:36:00	0.598103
	2022-01-17 08:56:00	0.610633
	2022-01-17 09:16:00	0.653138
	2022-01-17 09:36:00	0.621714
	2022-01-17 09:56:00	0.582661
	2022-01-17 10:16:00	0.608895
	2022-01-17 10:36:00	0.616436
	2022-01-17 10:56:00	0.609432
	2022-01-17 11:16:00	0.68865
	2022-01-17 11:36:00	0.755493
	2022-01-17 11:56:00	0.775826
	2022-01-17 12:16:00	0.76177
	2022-01-17 12:36:00	0.76602
	2022-01-17 12:56:00	0.732593
	2022-01-17 13:16:00	0.775539
	2022-01-17 13:36:00	0.704055
	2022-01-17 13:56:00	0.730443
	2022-01-17 14:16:00	0.698239
	2022-01-17 14:36:00	0.69397
	2022-01-17 14:56:00	0.662796
	2022-01-17 15:16:00	0.672637
	2022-01-17 15:36:00	0.63074
	2022-01-17 15:56:00	0.649402
	2022-01-17 16:16:00	0.686361
	2022-01-17 16:36:00	0.704546
	2022-01-17 16:56:00	0.761544
	2022-01-17 17:16:00	0.78695
	2022-01-17 17:36:00	0.770038
	2022-01-17 17:56:00	0.816016
	2022-01-17 18:16:00	0.857871
	2022-01-17 18:36:00	0.8959
	2022-01-17 18:56:00	0.938171
	2022-01-17 19:16:00	0.984729
	2022-01-17 19:36:00	0.94558
	2022-01-17 19:56:00	0.940768
	2022-01-17 20:16:00	0.946797
	2022-01-17 20:36:00	0.958325
	2022-01-17 20:56:00	0.97602
	2022-01-17 21:16:00	1.01747
	2022-01-17 21:36:00	1.02572
	2022-01-17 21:56:00	1.03254
	2022-01-17 22:16:00	1.02437
	2022-01-17 22:36:00	1.01409
	2022-01-17 22:56:00	0.926216
	2022-01-17 23:16:00	0.970757
	2022-01-17 23:36:00	0.983531
	2022-01-17 23:56:00	0.976477
	2022-01-18 00:02:00
	2022-01-18 00:07:19
	2022-01-18 00:12:38
	2022-01-18 00:17:57
	2022-01-18 00:46:00	0.944532
	2022-01-18 01:06:00	0.913569
	2022-01-18 01:26:00	0.878134
	2022-01-18 01:46:00	0.85611
	2022-01-18 02:06:00	0.83659
	2022-01-18 02:26:00	0.856491
	2022-01-18 02:46:00	0.869
	2022-01-18 03:06:00	0.867867
	2022-01-18 03:26:00	0.854676
	2022-01-18 03:46:00	0.853148
	2022-01-18 04:06:00	0.866946
	2022-01-18 04:26:00	0.896366
	2022-01-18 04:46:00	0.926677
	2022-01-18 05:06:00	0.950197
	2022-01-18 05:26:00	1.00899
	2022-01-18 05:46:00	1.05766
	2022-01-18 06:06:00	1.00976
	2022-01-18 06:26:00	0.992709
	2022-01-18 06:46:00	1.07968
	2022-01-18 07:06:00	1.07194
	2022-01-18 07:26:00	1.102
	2022-01-18 07:46:00	1.1051
	2022-01-18 08:06:00	1.16112
	2022-01-18 08:26:00	1.2718
	2022-01-18 08:46:00	1.28201
	2022-01-18 09:06:00	1.21746
	2022-01-18 09:26:00	1.18837
	2022-01-18 09:46:00	1.15981
	2022-01-18 10:06:00	1.15183
	2022-01-18 10:26:00	1.14848
	2022-01-18 10:46:00	1.10467
	2022-01-18 11:06:00	1.14255
	2022-01-18 11:26:00	1.13161
	2022-01-18 11:46:00	1.14479
	2022-01-18 12:06:00	1.11022
	2022-01-18 12:26:00	1.0925
	2022-01-18 12:46:00	1.15193
	2022-01-18 13:06:00	1.15015
	2022-01-18 13:26:00	1.08077
	2022-01-18 13:46:00	1.12414
	2022-01-18 14:06:00	1.05895
	2022-01-18 14:26:00	1.0617
	2022-01-18 14:46:00	1.06143
	2022-01-18 15:06:00	1.05052
	2022-01-18 15:26:00	1.01502
	2022-01-18 15:46:00	1.04489
	2022-01-18 16:06:00	1.05757
	2022-01-18 16:26:00	1.11345
	2022-01-18 16:46:00	1.33137
	2022-01-18 17:06:00	1.37315
	2022-01-18 17:26:00	1.35692
	2022-01-18 17:46:00	1.40255
	2022-01-18 18:06:00	1.35685
	2022-01-18 18:26:00	1.32863
	2022-01-18 18:46:00	1.38068
	2022-01-18 19:06:00	1.33093
	2022-01-18 19:26:00	1.3953
	2022-01-18 19:46:00	1.38669
	2022-01-18 20:06:00	1.34081
	2022-01-18 20:26:00	1.43638
	2022-01-18 20:46:00	1.36688
	2022-01-18 21:06:00	1.38915
	2022-01-18 21:26:00	1.38781
	2022-01-18 21:46:00	1.46172
	2022-01-18 22:06:00	1.36029
	2022-01-18 22:26:00	1.35495
	2022-01-18 22:46:00	1.26504
	2022-01-18 23:06:00	1.35003
	2022-01-18 23:26:00	1.28988
	2022-01-18 23:46:00	1.33552
	2022-01-19 00:06:00	1.36012
	2022-01-19 00:11:17
	2022-01-19 00:16:34
	2022-01-19 00:21:51
	2022-01-19 00:27:08
	2022-01-19 00:56:00	1.53884
	2022-01-19 01:16:00	1.48189
	2022-01-19 01:36:00	1.50796
	2022-01-19 01:56:00	1.48263
	2022-01-19 02:16:00	1.43884
	2022-01-19 02:36:00	1.37552
	2022-01-19 02:56:00	1.38164
	2022-01-19 03:16:00	1.35913
	2022-01-19 03:36:00	1.44917
	2022-01-19 03:56:00	1.38719
	2022-01-19 04:16:00	1.47808
	2022-01-19 04:36:00	1.39886
	2022-01-19 04:56:00	1.38459
	2022-01-19 05:16:00	1.31362
	2022-01-19 05:36:00	1.29935
	2022-01-19 05:56:00	1.26725
	2022-01-19 06:16:00	1.32383
	2022-01-19 06:36:00	1.29001
	2022-01-19 06:56:00	1.32577
	2022-01-19 07:16:00	1.33183
	2022-01-19 07:36:00	1.37488
	2022-01-19 07:56:00	1.43084
	2022-01-19 08:16:00	1.35052
	2022-01-19 08:36:00	1.34665
	2022-01-19 08:56:00	1.34191
	2022-01-19 09:16:00	1.33712
	2022-01-19 09:36:00	1.298
	2022-01-19 09:56:00	1.25439
	2022-01-19 10:16:00	1.30746
	2022-01-19 10:36:00	1.25648
	2022-01-19 10:56:00	1.20076
	2022-01-19 11:16:00	1.17869
	2022-01-19 11:36:00	1.27908
	2022-01-19 11:56:00	1.27414
	2022-01-19 12:16:00	1.31473
	2022-01-19 12:36:00	1.26643
	2022-01-19 12:56:00	1.25015
	2022-01-19 13:16:00	1.21505
	2022-01-19 13:36:00	1.1675
	2022-01-19 13:56:00	1.28226
	2022-01-19 14:16:00	1.27389
	2022-01-19 14:36:00	1.10287
	2022-01-19 14:56:00	1.13236
	2022-01-19 15:16:00	1.12847
	2022-01-19 15:36:00	1.12162
	2022-01-19 15:56:00	1.06041
	2022-01-19 16:16:00	1.08959
	2022-01-19 16:36:00	1.15273
	2022-01-19 16:56:00	1.12145
	2022-01-19 17:16:00	0.994182
	2022-01-19 17:36:00	1.01752
	2022-01-19 17:56:00	0.979225
	2022-01-19 18:16:00	1.00589
	2022-01-19 18:36:00	0.935075
	2022-01-19 18:56:00	0.913305
	2022-01-19 19:16:00	0.945287
	2022-01-19 19:36:00	1.02666
	2022-01-19 19:56:00	0.907914
	2022-01-19 20:16:00	0.675989
	2022-01-19 20:36:00	0.57386
	2022-01-19 20:56:00	0.524004
	2022-01-19 21:16:00	0.543225
	2022-01-19 21:36:00	0.509435
	2022-01-19 21:56:00	0.421693
	2022-01-19 22:16:00	0.445456
	2022-01-19 22:36:00	0.407749
	2022-01-19 22:56:00	0.380116
	2022-01-19 23:16:00	0.375194
	2022-01-19 23:36:00	0.347239
	2022-01-19 23:56:00	0.366276
	2022-01-20 00:02:00
	2022-01-20 00:07:18
	2022-01-20 00:12:37
	2022-01-20 00:17:55
	2022-01-20 00:46:00	0.416509
	2022-01-20 01:06:00	0.430012
	2022-01-20 01:26:00	0.424026
	2022-01-20 01:46:00	0.451589
	2022-01-20 02:06:00	0.461674
	2022-01-20 02:26:00	0.46759
	2022-01-20 02:46:00	0.515995
	2022-01-20 03:06:00	0.606549
	2022-01-20 03:26:00	0.653465
	2022-01-20 03:46:00	0.64441
	2022-01-20 04:06:00	0.640872
	2022-01-20 04:26:00	0.710515
	2022-01-20 04:46:00	0.70397
	2022-01-20 05:06:00	0.768563
	2022-01-20 05:26:00	0.77664
	2022-01-20 05:46:00	0.811424
	2022-01-20 06:06:00	0.875047
	2022-01-20 06:26:00	0.909838
	2022-01-20 06:46:00	1.13499
	2022-01-20 07:06:00	1.08326
	2022-01-20 07:26:00	1.27066
	2022-01-20 07:46:00	1.19364
	2022-01-20 08:06:00	1.16544
	2022-01-20 08:26:00	1.2324
	2022-01-20 08:46:00	1.20946
	2022-01-20 09:06:00	1.20555
	2022-01-20 09:26:00	1.23682
	2022-01-20 09:46:00	1.16962
	2022-01-20 10:06:00	1.23732
	2022-01-20 10:26:00	1.20372
	2022-01-20 10:46:00	1.12751
	2022-01-20 11:06:00	1.15481
	2022-01-20 11:26:00	1.22229
	2022-01-20 11:46:00	1.2042
	2022-01-20 12:06:00	1.15362
	2022-01-20 12:26:00	1.17183
	2022-01-20 12:46:00	1.18144
	2022-01-20 13:06:00	1.12583
	2022-01-20 13:26:00	1.06876
	2022-01-20 13:46:00	1.0877
	2022-01-20 14:06:00	1.12002
	2022-01-20 14:26:00	1.09109
	2022-01-20 14:46:00	1.05357
	2022-01-20 15:06:00	1.07893
	2022-01-20 15:26:00	1.03004
	2022-01-20 15:46:00	1.05738
	2022-01-20 16:06:00	1.05811
	2022-01-20 16:26:00	1.07478
	2022-01-20 16:46:00	1.05621
	2022-01-20 17:06:00	1.07314
	2022-01-20 17:26:00	0.944092
	2022-01-20 17:46:00	0.938261
	2022-01-20 18:06:00	0.900435
	2022-01-20 18:26:00	0.943514
	2022-01-20 18:46:00	0.922263
	2022-01-20 19:06:00	0.93461
	2022-01-20 19:26:00	0.986499
	2022-01-20 19:46:00	0.93755
	2022-01-20 20:06:00	0.999603
	2022-01-20 20:26:00	0.996447
	2022-01-20 20:46:00	1.0432
	2022-01-20 21:06:00	0.999206
	2022-01-20 21:26:00	1.06935
	2022-01-20 21:46:00	1.03035
	2022-01-20 22:06:00	1.01273
	2022-01-20 22:26:00	1.05203
	2022-01-20 22:46:00	1.05783
	2022-01-20 23:06:00	1.05058
	2022-01-20 23:26:00	1.13296
	2022-01-20 23:46:00	1.1394
	2022-01-21 00:06:00	1.15122
	2022-01-21 00:11:18
	2022-01-21 00:16:36
	2022-01-21 00:21:54
	2022-01-21 00:27:12
	2022-01-21 00:56:00	1.06919
	2022-01-21 01:16:00	1.02791
	2022-01-21 01:36:00	1.02411
	2022-01-21 01:56:00	0.939379
	2022-01-21 02:16:00	0.91192
	2022-01-21 02:36:00	0.719961
	2022-01-21 02:56:00	0.592297
	2022-01-21 03:16:00	0.589154
	2022-01-21 03:36:00	0.581576
	2022-01-21 03:56:00	0.572911
	2022-01-21 04:16:00	0.60655
	2022-01-21 04:36:00	0.604765
	2022-01-21 04:56:00	0.616542
	2022-01-21 05:16:00	0.601778
	2022-01-21 05:36:00	0.657513
	2022-01-21 05:56:00	0.639897
	2022-01-21 06:16:00	0.665615
	2022-01-21 06:36:00	0.702303
	2022-01-21 06:56:00	0.710437
	2022-01-21 07:16:00	0.754206
	2022-01-21 07:36:00	0.775089
	2022-01-21 07:56:00	0.774587
	2022-01-21 08:16:00	0.828505
	2022-01-21 08:36:00	0.878016
	2022-01-21 08:56:00	0.954456
	2022-01-21 09:16:00	0.938935
	2022-01-21 09:36:00	0.950401
	2022-01-21 09:56:00	0.933989
	2022-01-21 10:16:00	0.9709
	2022-01-21 10:36:00	0.923999
	2022-01-21 10:56:00	0.933216
	2022-01-21 11:16:00	0.928257
	2022-01-21 11:36:00	0.963736
	2022-01-21 11:56:00	0.952491
	2022-01-21 12:16:00	0.961914
	2022-01-21 12:36:00	0.941225
	2022-01-21 12:56:00	0.953977
	2022-01-21 13:16:00	0.919905
	2022-01-21 13:36:00	0.969914
	2022-01-21 13:56:00	0.941917
	2022-01-21 14:16:00	0.970488
	2022-01-21 14:36:00	1.01405
	2022-01-21 14:56:00	1.09206
	2022-01-21 15:16:00	1.02222
	2022-01-21 15:36:00	0.978394
	2022-01-21 15:56:00	0.970281
	2022-01-21 16:16:00	0.977065
	2022-01-21 16:36:00	0.894095
	2022-01-21 16:56:00	0.93919
	2022-01-21 17:16:00	0.959154
	2022-01-21 17:36:00	0.953277
	2022-01-21 17:56:00	0.936739
	2022-01-21 18:16:00	0.852701
	2022-01-21 18:36:00	0.875284
	2022-01-21 18:56:00	0.927592
	2022-01-21 19:16:00	0.839308
	2022-01-21 19:36:00	0.821593
	2022-01-21 19:56:00	0.828055
	2022-01-21 20:16:00	0.858097
	2022-01-21 20:36:00	0.92091
	2022-01-21 20:56:00	0.829505
	2022-01-21 21:16:00	0.866891
	2022-01-21 21:36:00	0.886654
	2022-01-21 21:56:00	0.829022
	2022-01-21 22:16:00	0.798219
	2022-01-21 22:36:00	0.784256
	2022-01-21 22:56:00	0.805466
	2022-01-21 23:16:00	0.812947
	2022-01-21 23:36:00	0.826755
	2022-01-21 23:56:00	0.810694
	2022-01-22 00:02:00
	2022-01-22 00:07:18
	2022-01-22 00:12:35
	2022-01-22 00:17:54
	2022-01-22 00:46:00	0.873232
	2022-01-22 01:06:00	0.840794
	2022-01-22 01:26:00	0.843332
	2022-01-22 01:46:00	0.815485
	2022-01-22 02:06:00	0.832617
	2022-01-22 02:26:00	0.803654
	2022-01-22 02:46:00	0.816777
	2022-01-22 03:06:00	0.780436
	2022-01-22 03:26:00	0.868823
	2022-01-22 03:46:00	0.85093
	2022-01-22 04:06:00	0.863091
	2022-01-22 04:26:00	0.879041
	2022-01-22 04:46:00	0.878039
	2022-01-22 05:06:00	0.933032
	2022-01-22 05:26:00	0.930438
	2022-01-22 05:46:00	0.981986
	2022-01-22 06:06:00	1.00339
	2022-01-22 06:26:00	1.04471
	2022-01-22 06:46:00	1.07127
	2022-01-22 07:06:00	1.14142
	2022-01-22 07:26:00	1.20189
	2022-01-22 07:46:00	1.11244
	2022-01-22 08:06:00	1.19176
	2022-01-22 08:26:00	1.2324
	2022-01-22 08:46:00	1.19363
	2022-01-22 09:06:00	1.24604
	2022-01-22 09:26:00	1.26467
	2022-01-22 09:46:00	1.13054
	2022-01-22 10:06:00	1.08274
	2022-01-22 10:26:00	1.08586
	2022-01-22 10:46:00	1.13001
	2022-01-22 11:06:00	1.11011
	2022-01-22 11:26:00	1.046
	2022-01-22 11:46:00	1.06089
	2022-01-22 12:06:00	1.12478
	2022-01-22 12:26:00	1.0892
	2022-01-22 12:46:00	1.07043
	2022-01-22 13:06:00	1.10672
	2022-01-22 13:26:00	1.11842
	2022-01-22 13:46:00	1.11796
	2022-01-22 14:06:00	1.07091
	2022-01-22 14:26:00	1.06003
	2022-01-22 14:46:00	1.16183
	2022-01-22 15:06:00	1.01075
	2022-01-22 15:26:00	1.0942
	2022-01-22 15:46:00	1.09287
	2022-01-22 16:06:00	1.15645
	2022-01-22 16:26:00	1.08981
	2022-01-22 16:46:00	1.10014
	2022-01-22 17:06:00	1.07263
	2022-01-22 17:26:00	1.04077
	2022-01-22 17:46:00	1.06175
	2022-01-22 18:06:00	1.0357
	2022-01-22 18:26:00	1.01546
	2022-01-22 18:46:00	1.04964
	2022-01-22 19:06:00	1.1005
	2022-01-22 19:26:00	0.93882
	2022-01-22 19:46:00	1.07112
	2022-01-22 20:06:00	1.06813
	2022-01-22 20:26:00	1.03874
	2022-01-22 20:46:00	1.04169
	2022-01-22 21:06:00	0.97275
	2022-01-22 21:26:00	0.913501
	2022-01-22 21:46:00	0.891988
	2022-01-22 22:06:00	0.911797
	2022-01-22 22:26:00	0.861615
	2022-01-22 22:46:00	0.835581
	2022-01-22 23:06:00	0.839004
	2022-01-22 23:26:00	0.880041
	2022-01-22 23:46:00	0.852338
	2022-01-23 00:06:00	0.878018
	2022-01-23 00:11:18
	2022-01-23 00:16:36
	2022-01-23 00:21:54
	2022-01-23 00:27:12
	2022-01-23 00:56:00	0.880813
	2022-01-23 01:16:00	0.883767
	2022-01-23 01:36:00	0.84674
	2022-01-23 01:56:00	0.880982
	2022-01-23 02:16:00	0.864927
	2022-01-23 02:36:00	0.871815
	2022-01-23 02:56:00	0.838942
	2022-01-23 03:16:00	0.83739
	2022-01-23 03:36:00	0.866982
	2022-01-23 03:56:00	0.834353
	2022-01-23 04:16:00	0.859888
	2022-01-23 04:36:00	0.870312
	2022-01-23 04:56:00	0.846952
	2022-01-23 05:16:00	0.857262
	2022-01-23 05:36:00	0.839234
	2022-01-23 05:56:00	0.866385
	2022-01-23 06:16:00	0.866958
	2022-01-23 06:36:00	0.945849
	2022-01-23 06:56:00	0.935819
	2022-01-23 07:16:00	0.992555
	2022-01-23 07:36:00	0.981474
	2022-01-23 07:56:00	1.0443
	2022-01-23 08:16:00	1.02978
	2022-01-23 08:36:00	0.992876
	2022-01-23 08:56:00	1.0088
	2022-01-23 09:16:00	1.03786
	2022-01-23 09:36:00	0.954679
	2022-01-23 09:56:00	0.930306
	2022-01-23 10:16:00	1.00228
	2022-01-23 10:36:00	1.01725
	2022-01-23 10:56:00	1.0046
	2022-01-23 11:16:00	1.02996
	2022-01-23 11:36:00	1.08459
	2022-01-23 11:56:00	1.13069
	2022-01-23 12:16:00	1.08993
	2022-01-23 12:36:00	1.09445
	2022-01-23 12:56:00	0.987772
	2022-01-23 13:16:00	1.0273
	2022-01-23 13:36:00	0.986568
	2022-01-23 13:56:00	0.950558
	2022-01-23 14:16:00	1.02862
	2022-01-23 14:36:00	1.03853
	2022-01-23 14:56:00	1.0573
	2022-01-23 15:16:00	1.00878
	2022-01-23 15:36:00	0.971317
	2022-01-23 15:56:00	0.98278
	2022-01-23 16:16:00	0.931651
	2022-01-23 16:36:00	0.905518
	2022-01-23 16:56:00	0.951323
	2022-01-23 17:16:00	0.935407
	2022-01-23 17:36:00	0.934968
	2022-01-23 17:56:00	0.925221
	2022-01-23 18:16:00	0.884144
	2022-01-23 18:36:00	0.870191
	2022-01-23 18:56:00	0.853525
	2022-01-23 19:16:00	0.85577
	2022-01-23 19:36:00	0.842028
	2022-01-23 19:56:00	0.8207
	2022-01-23 20:16:00	0.822286
	2022-01-23 20:36:00	0.805568
	2022-01-23 20:56:00	0.830638
	2022-01-23 21:16:00	0.820581
	2022-01-23 21:36:00	0.890383
	2022-01-23 21:56:00	0.907872
	2022-01-23 22:16:00	0.857079
	2022-01-23 22:36:00	0.944329
	2022-01-23 22:56:00	0.801672
	2022-01-23 23:16:00	0.758796
	2022-01-23 23:36:00	0.779717
	2022-01-23 23:56:00	0.826614
	2022-01-24 00:02:00
	2022-01-24 00:07:18
	2022-01-24 00:12:36
	2022-01-24 00:17:54
	2022-01-24 00:46:00	0.832771
	2022-01-24 01:06:00	0.834471
	2022-01-24 01:26:00	0.758657
	2022-01-24 01:46:00	0.780163
	2022-01-24 02:06:00	0.772975
	2022-01-24 02:26:00	0.862264
	2022-01-24 02:46:00	0.749488
	2022-01-24 03:06:00	0.796444
	2022-01-24 03:26:00	0.78929
	2022-01-24 03:46:00	0.82395
	2022-01-24 04:06:00	0.803647
	2022-01-24 04:26:00	0.826327
	2022-01-24 04:46:00	0.801958
	2022-01-24 05:06:00	0.836225
	2022-01-24 05:26:00	0.889635
	2022-01-24 05:46:00	0.87316
	2022-01-24 06:06:00	0.940191
	2022-01-24 06:26:00	0.996319
	2022-01-24 06:46:00	1.00397
	2022-01-24 07:06:00	0.962033
	2022-01-24 07:26:00	0.976378
	2022-01-24 07:46:00	0.942986
	2022-01-24 08:06:00	0.955764
	2022-01-24 08:26:00	1.00985
	2022-01-24 08:46:00	1.01967
	2022-01-24 09:06:00	1.07253
	2022-01-24 09:26:00	1.03171
	2022-01-24 09:46:00	0.983472
	2022-01-24 10:06:00	0.978521
	2022-01-24 10:26:00	0.929754
	2022-01-24 10:46:00	0.956237
	2022-01-24 11:06:00	0.943243
	2022-01-24 11:26:00	0.935559
	2022-01-24 11:46:00	0.918177
	2022-01-24 12:06:00	0.973797
	2022-01-24 12:26:00	0.951824
	2022-01-24 12:46:00	0.926881
	2022-01-24 13:06:00	0.902348
	2022-01-24 13:26:00	0.915603
	2022-01-24 13:46:00	0.912938
	2022-01-24 14:06:00	0.92525
	2022-01-24 14:26:00	0.967401
	2022-01-24 14:46:00	0.959173
	2022-01-24 15:06:00	1.04201
	2022-01-24 15:26:00	1.11207
	2022-01-24 15:46:00	1.08881
	2022-01-24 16:06:00	1.01983
	2022-01-24 16:26:00	1.03108
	2022-01-24 16:46:00	1.00561
	2022-01-24 17:06:00	1.03717
	2022-01-24 17:26:00	0.958956
	2022-01-24 17:46:00	0.931034
	2022-01-24 18:06:00	0.862167
	2022-01-24 18:26:00	0.906459
	2022-01-24 18:46:00	1.08977
	2022-01-24 19:06:00	1.11393
	2022-01-24 19:26:00	1.06639
	2022-01-24 19:46:00	1.09324
	2022-01-24 20:06:00	0.975668
	2022-01-24 20:26:00	0.916106
	2022-01-24 20:46:00	0.900536
	2022-01-24 21:06:00	0.901162
	2022-01-24 21:26:00	0.884771
	2022-01-24 21:46:00	0.901926
	2022-01-24 22:06:00	0.903817
[truncated: 400 more rows]

## Sheet: Original hg soil
	sample ID	GPS latitude
		latitude (S)			longitude (E)			No	Hg Cocentration in soil (ng/g)
East Ongul A
	9A	-69	0	25.665	39	33	58.1121	9	0.723333
	12A	-69	0	15.9839	39	34	7.1182	12	0.914
	13A	-69	0	19.2112	39	34	7.1164	13	0.709667
	16A	-69	0	28.893	39	34	7.1109	16	0.939333
	18A	-69	0	15.9845	39	34	16.1177	18	0.488667
	19A	-69	0	19.2117	39	34	16.1163	19	4.107
	20A	-69	0	22.439	39	34	16.1148	20	1.26467
	21A	-69	0	25.6663	39	34	16.1133	21	1.86633
	22A	-69	0	28.8936	39	34	16.1119	22	1.59667
	23A	-69	0	32.1208	39	34	16.1104	23	10.2263
	27A	-69	0	12.7577	39	34	25.1184	27	0.636
	28A	-69	0	15.9849	39	34	25.1173	28	3.51433
	29A	-69	0	19.2122	39	34	25.1162	29	7.73767
	30A	-69	0	22.4395	39	34	25.1151	30	3.7925
	31A	-69	0	25.6668	39	34	25.114	31	1.902
	33A	-69	0	32.1213	39	34	25.1118	33	1.75633
	34A	-69	0	12.758	39	34	34.1175	34	5.45133
	35A	-69	0	15.9853	39	34	34.1168	35	4.87167
	36A	-69	0	19.2125	39	34	34.116	36	10.8017
	38A	-69	0	25.6671	39	34	34.1146	38	4.57933
	39A	-69	0	28.8944	39	34	34.1138	39	1.024
	40A	-69	0	32.1216	39	34	34.1131	40	0.59
	45A	-69	0	12.7582	39	34	43.1167	45	6.02333
	46A	-69	0	15.9855	39	34	43.1163	46	16.994
	47A	-69	0	19.2127	39	34	43.1159	47	4.92
	48A	-69	0	22.44	39	34	43.1156	48	5.00033
	50A	-69	0	28.8946	39	34	43.1148	50	0.386
	51A	-69	0	32.1218	39	34	43.1145	51	1.062
	52A	-69	0	12.7582	39	34	52.1158	52	3.57967
	53A	-69	0	15.9855	39	34	52.1158	53	18.999
	54A	-69	0	19.2128	39	34	52.1158	54	2.47033
	55A	-69	0	22.4401	39	34	52.1158	55	1.925
	56A	-69	0	25.6674	39	34	52.1158	56	0.612667
	57A	-69	0	28.8946	39	34	52.1158	57	1.7835
	58A	-69	0	32.1219	39	34	52.1158	58	0.881667
	66A	-69	0	19.2127	39	35	1.1157	66	8.74933
	67A	-69	0	22.44	39	35	1.116	67	1.91967
	69A	-69	0	28.8946	39	35	1.1168	69	0.629
	70A	-69	0	32.1218	39	35	1.1171	70	1.669
	72A	-69	0	19.2125	39	35	10.1156	72	2.55667
	73A	-69	0	22.4398	39	35	10.1163	73	2.982
	74A	-69	0	25.6671	39	35	10.117	74	4.43433
	75A	-69	0	28.8944	39	35	10.1178	75	2.137
	76A	-69	0	32.1216	39	35	10.1185	76	1.51433
	82A	-69	0	19.2122	39	35	19.1154	82	1.86
	83A	-69	0	15.9849	39	35	19.1143	83	1.723
	84A	-69	0	12.7577	39	35	19.1132	84	1.15633
	85A	-69	0	9.5304	39	35	19.1121	85	0.947
	86A	-69	0	6.3031	39	35	19.111	86	0.988333
	88A	-69	0	19.2117	39	35	28.1153	88	3.773
	89A	-69	0	22.439	39	35	28.1168	89	1.735
	90A	-69	0	25.6663	39	35	28.1183	90	1.24967
	91A	-69	0	28.8936	39	35	28.1197	91	5.2915
	92A	-69	0	32.1208	39	35	28.1212	92	2.9365
	97A	-69	0	15.9839	39	35	37.1134	97	3.31333
	99A	-69	0	22.4384	39	35	37.117	99	2.45067
	100A	-69	0	25.6657	39	35	37.1189	100	1.01467
	101A	-69	0	28.893	39	35	37.1207	101	1.25033
	102A	-69	0	32.1203	39	35	37.1225	102	3.526
	104A	-69	0	15.9832	39	35	46.1129	104	1.27267
	105A	-69	0	19.2104	39	35	46.1151	105	2.48967
	106A	-69	0	22.4377	39	35	46.1173	106	1.37233
	107A	-69	0	25.665	39	35	46.1195	107	0.63
	108A	-69	0	28.8923	39	35	46.1217	108	1.45133
	109A	-69	0	32.1195	39	35	46.1239	109	1.15967
	114A	-69	0	15.9823	39	35	55.1124	114	0.725
	115A	-69	0	19.2096	39	35	55.115	115	1.12333
	117A	-69	0	25.6641	39	35	55.1201	117	2.01767
	119A	-69	0	32.1187	39	35	55.1252	119	1.41667
	121A	-69	0	19.2086	39	36	4.1148	121	1.06433
	123A	-69	0	25.6631	39	36	4.1207	123	0.95
	129A	-69	0	19.2075	39	36	13.1147	129	1.161
	130A	-69	0	22.4348	39	36	13.118	130	0.731
	131A	-69	0	25.662	39	36	13.1213	131	1.68
	132A	-69	0	28.8893	39	36	13.1246	132	1.10833
	133A	-69	0	32.1166	39	36	13.1279	133	3.53667
	134A	-69	0	19.2062	39	36	22.1146	134	4.62667
	135A	-69	0	22.4335	39	36	22.1183	135	13.6757
	137A	-69	0	28.8893	39	36	22.1219	137	1.92033
East Ongul B
	8B	-69	0	57.9359	39	33	40.0815	8	0.451
	24B	-69	0	45.0299	39	34	16.1045	24	0.711333
	25B	-69	0	51.4845	39	34	16.1016	25	0.554667
	41B	-69	0	38.5762	39	34	34.1116	41	1.455
	42B	-69	0	45.0307	39	34	34.1102	42	2.58467
	43B	-69	0	51.4853	39	34	34.1087	43	0.864
	59B	-69	0	38.5764	39	34	52.1158	59	0.906333
	60B	-69	0	45.031	39	34	52.1158	60	1.11267
	61B	-69	0	51.4855	39	34	52.1158	61	0.978
	62B	-69	0	57.9401	39	34	52.1158	62	1.82567
	77B	-69	0	38.5762	39	35	10.12	77	0.76
	78B	-69	0	45.0307	39	35	10.1214	78	1.03633
	79B	-69	0	51.4853	39	35	10.1229	79	0.773
	80B	-69	0	57.9398	39	35	10.1244	80	0.899
	93B	-69	0	38.5754	39	35	28.1241	93	1.388
	94B	-69	0	45.0299	39	35	28.1271	94	1.20433
	95B	-69	0	51.4845	39	35	28.13	95	1.26167
	96B	-69	0	57.939	39	35	28.1329	96	0.141
	110B	-69	0	38.5741	39	35	46.1283	110	1.07233
	111B	-69	0	45.0286	39	35	46.1327	111	1.514
	112B	-69	0	51.4832	39	35	46.1371	112	0.603333
	126B	-69	0	38.5722	39	36	4.1324	126	3.149
	127B	-69	0	45.0268	39	36	4.1383	127	2.83433

## Sheet: Original shirase Hg conc atmosp
Observed at Shirase
	Hg concentration (ng/m3)
2021-12-16 14:02:32	0.813
2021-12-16 14:15:47	0.82
2021-12-16 14:29:03	1.093
2021-12-17 11:49:53	1.088
2021-12-17 12:03:08	1.1
2021-12-17 12:16:24	1.103
2021-12-18 09:56:17	0.815
2021-12-18 10:09:32	0.82
2021-12-18 10:22:48	0.824
2021-12-19 19:53:55	0.823
2021-12-19 20:07:11	1.109
2021-12-19 20:20:27	1.111
2021-12-20 08:42:23	0.818
2021-12-20 08:55:38	0.828
2021-12-20 09:08:54	0.832
2021-12-21 20:07:57	0.544
2021-12-21 20:21:13	0.549
2021-12-21 20:34:28	0.826
2022-01-02 08:44:06	1.068
2022-01-02 08:57:22	1.079
2022-01-02 09:10:38	0.813
2022-01-02 09:23:53	0.811
2022-01-02 09:37:09	0.81
2022-01-02 09:50:25	0.809
