# Supplementary material for: Atmospheric mercury concentration variations at Syowa Station, Lützow-Holm Bay, East Antarctica and contributing factors
Source: Royal Society of Chemistry journal article supplement (doi:10.1039/d4va00166d), 2024-11-12
Supplement: d4va00166d2.pdf [file d4va00166d2.pdf]

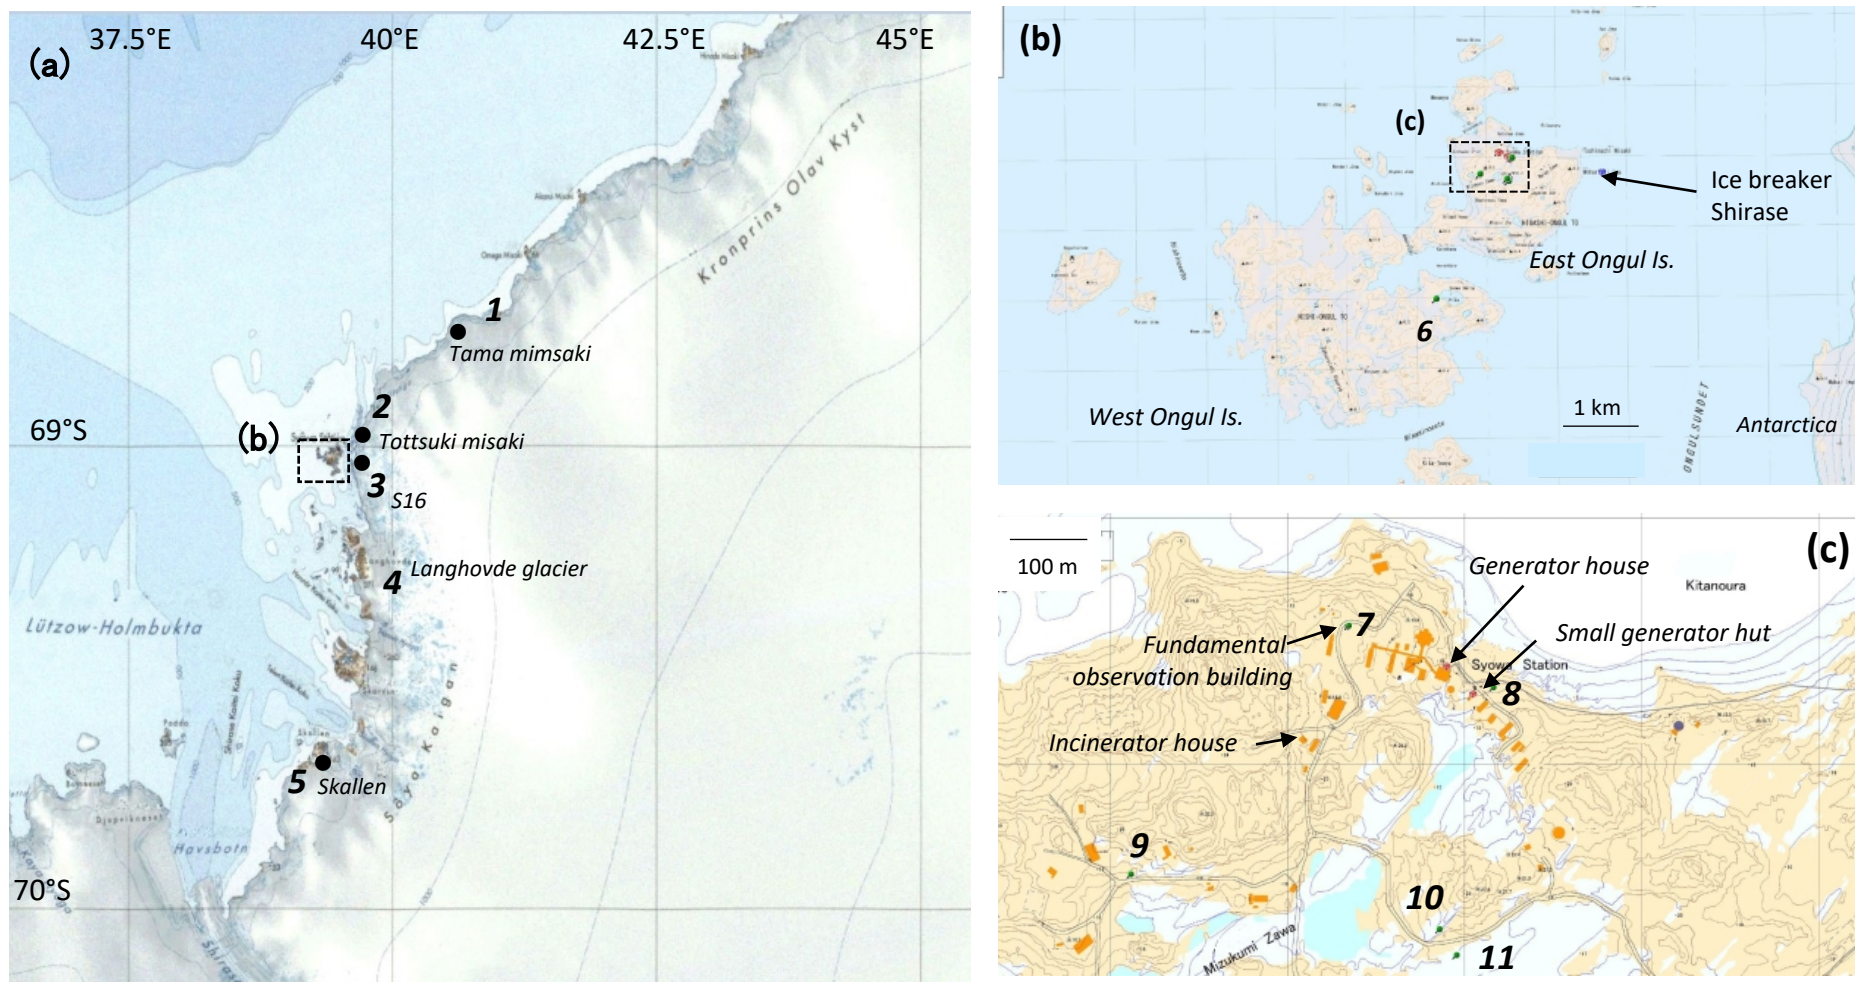

## Sampling sites

(a) Lützow-Holm Bay, (b) Ongul Island, (c) Main area of Syowa station.  
The digits represent the sampling points of snow, glacier, and ice sheet

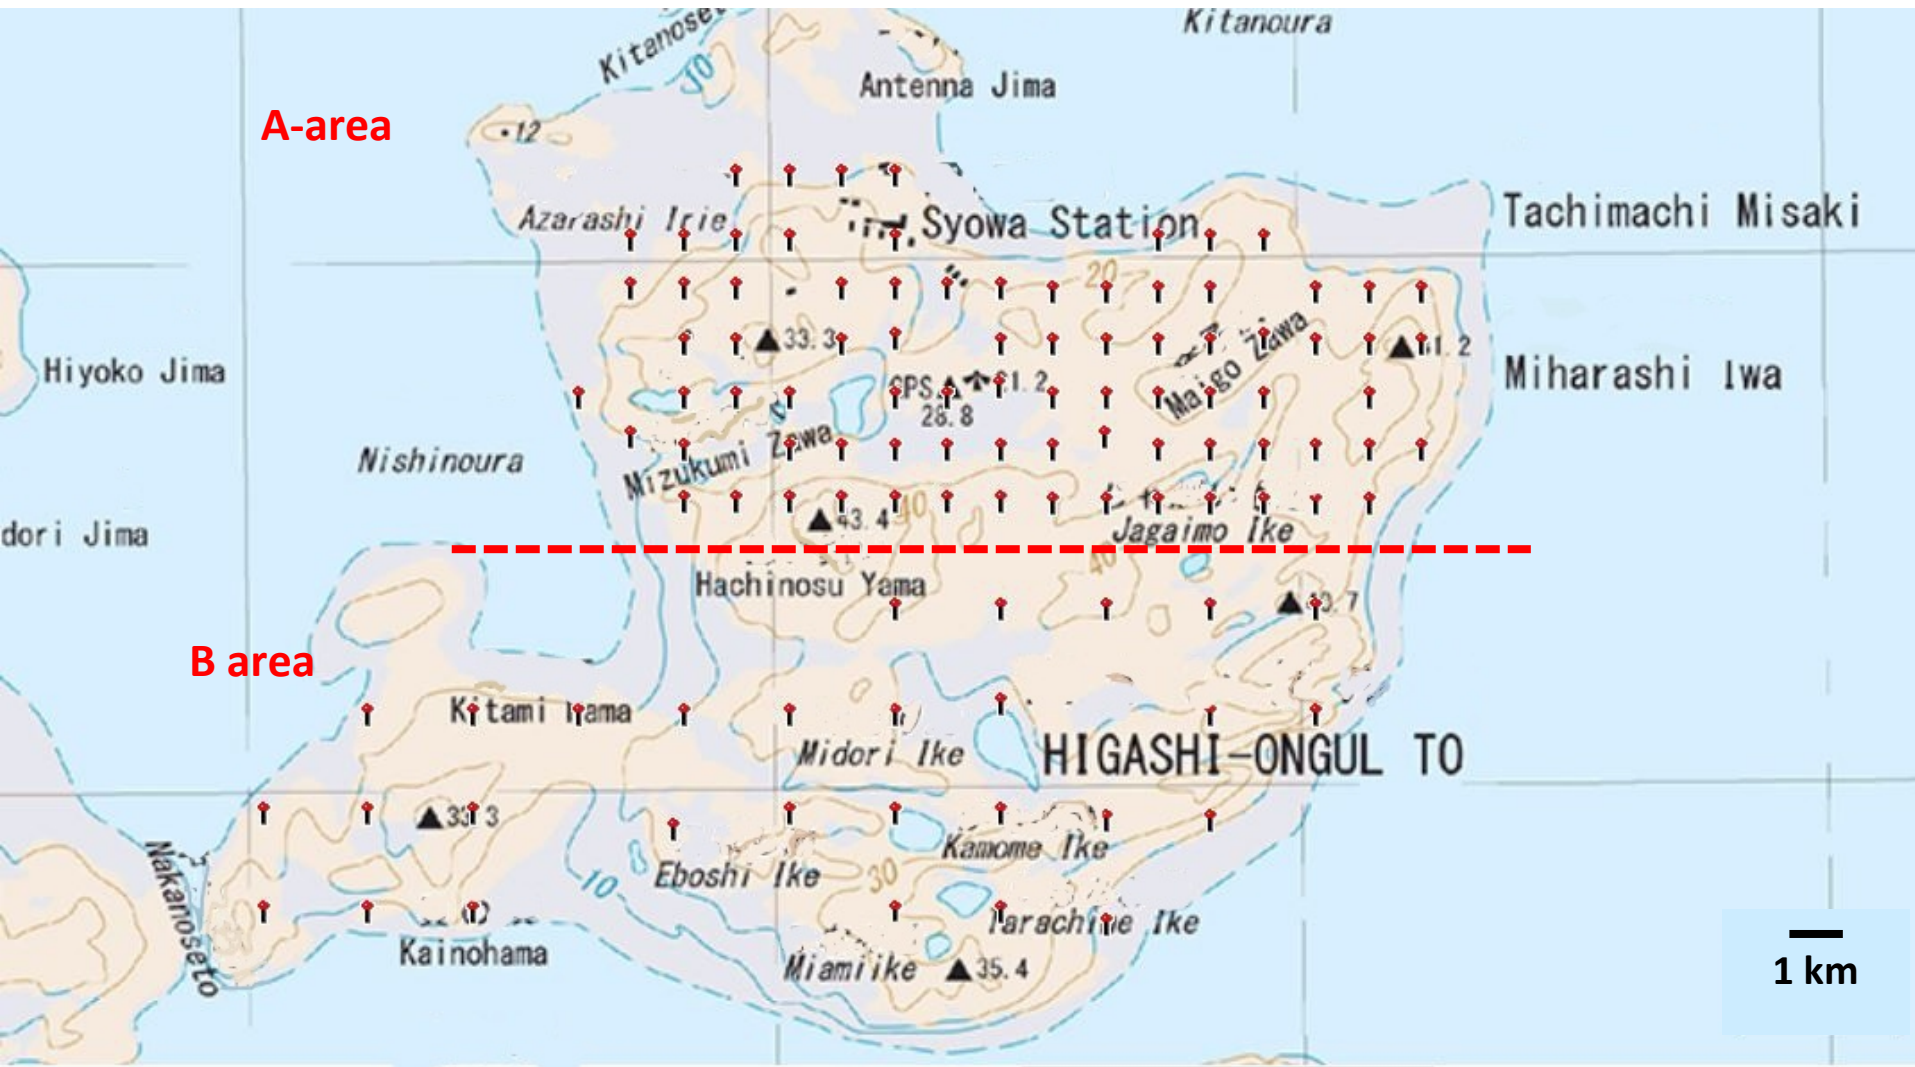

Sampling points for soil samples

## Ongul Island

East Ongul Island-  
Syowa station (snowing)

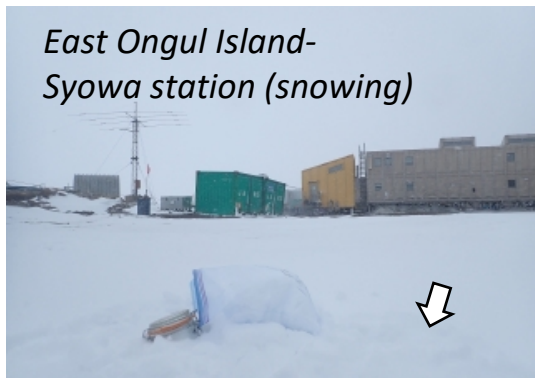

East Ongul Island-  
Syowa station

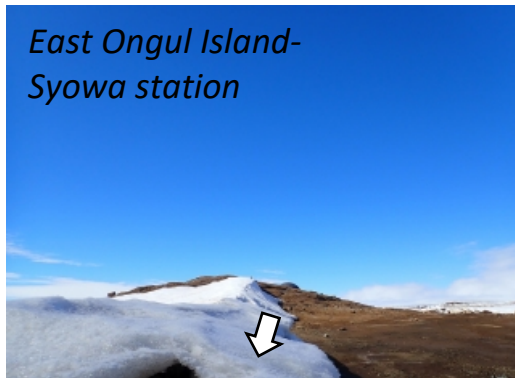

West Ongul Island

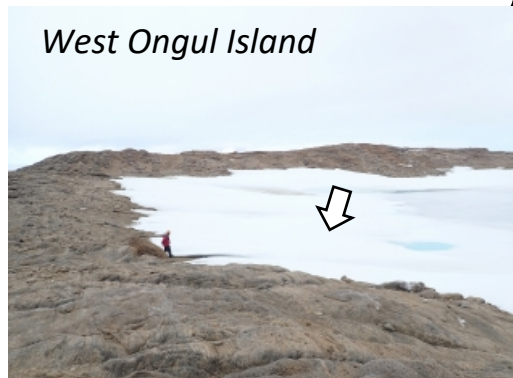

## Glacier, Ice sheet

Cape Tottuki

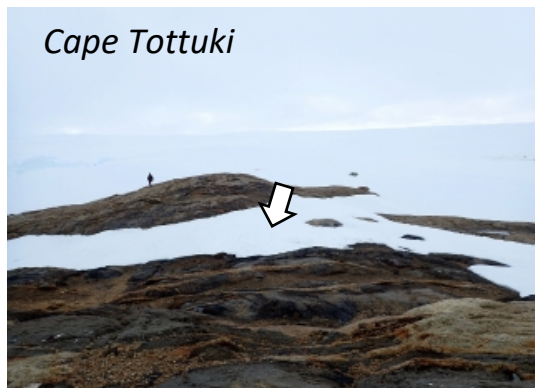

S16

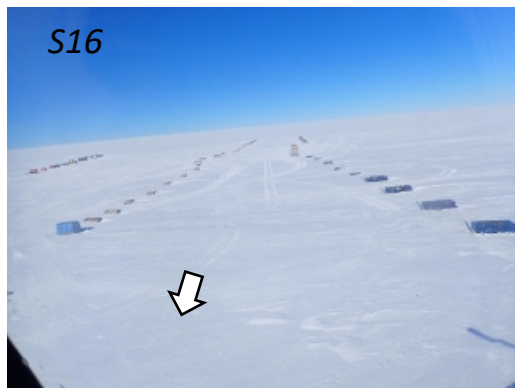

Langhovde glacier

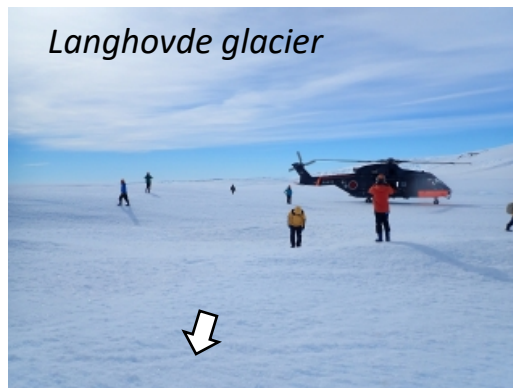

## Ice Free, Coastal area

Skallen

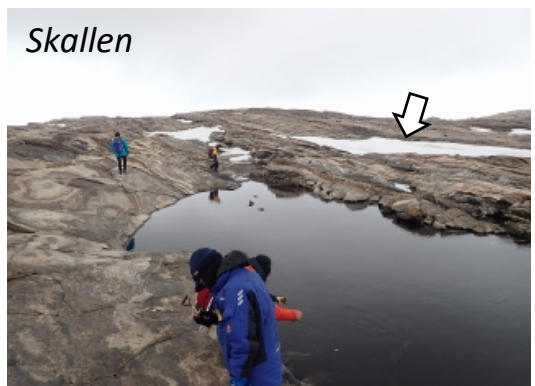

Cape Tama

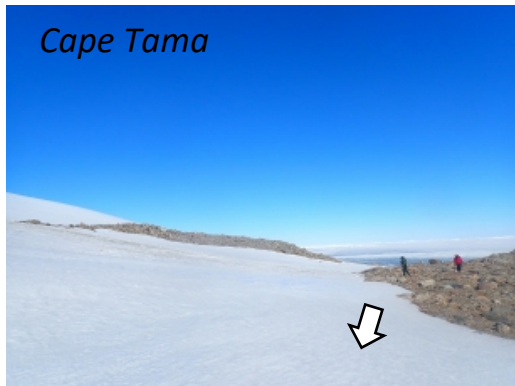

Snow, glacier, ice sheet sampling points

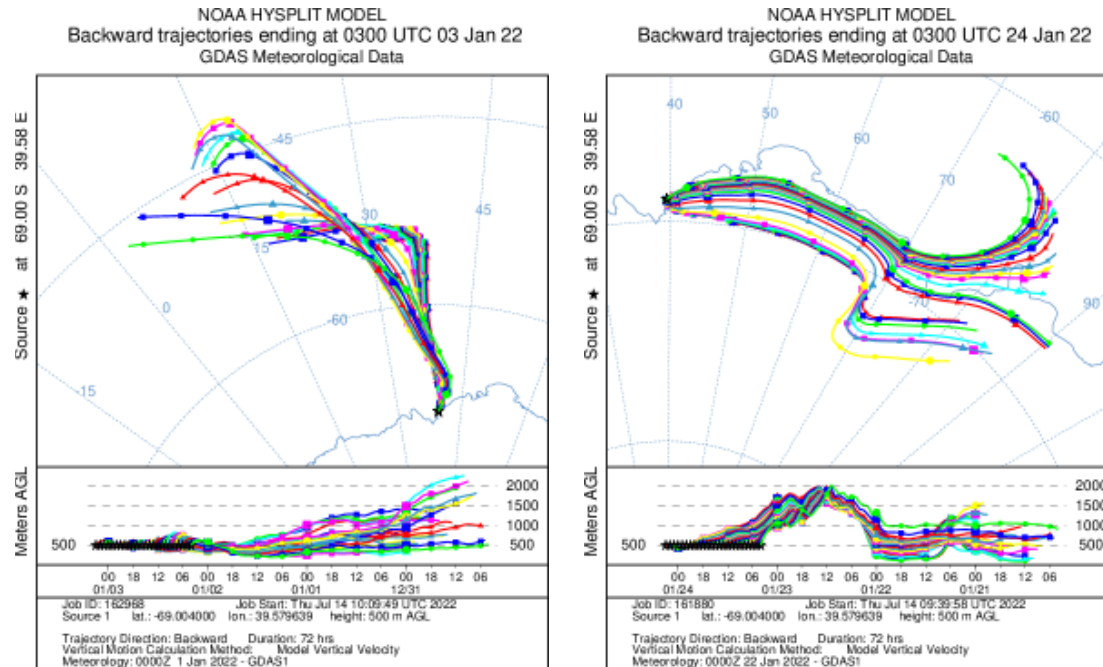

Result of back trajectory analysis with the starting point at Fundamental observation building, Syowa station  
(a) January 3, 2022, (b) January 24, 2022
